# Supplementary material
Source: publisher figshare collection journal article supplement (https://acs.figshare.com/ndownloader/files/4574884)

# Organocatalytic Dimerization of Ketoketenes

## Supporting information

**Ahmad A. Ibrahim, Gero D. Harzmann, and Nessim J. Kerrigan\***

*Department of Chemistry, Oakland University, 2200 N. Squirrel Rd., Rochester, Michigan 48309, USA.*

### Table of contents:

|                                           |     |
|-------------------------------------------|-----|
| General Information                       | S2  |
| Method A for dimerization of ketoketenes  | S3  |
| Method B for dimerization of ketoketenes  | S3  |
| Experimental procedure for <b>4a</b>      | S3  |
| Experimental procedure for <b>4b</b>      | S4  |
| Experimental procedure for (-)- <b>4b</b> | S4  |
| Experimental procedure for <b>4c</b>      | S4  |
| Experimental procedure for <b>4d</b>      | S4  |
| Experimental procedure for <b>4e</b>      | S5  |
| Experimental procedure for <b>4f</b>      | S5  |
| Experimental procedure for <b>4g</b>      | S5  |
| Experimental procedure for <b>4h</b>      | S6  |
| Experimental procedure for <b>7</b>       | S6  |
| Experimental procedure for <b>8</b>       | S7  |
| Experimental procedure for <b>9</b>       | S8  |
| Experimental procedure for <b>10</b>      | S9  |
| Experimental procedure for <b>5a</b>      | S10 |
| <sup>1</sup> H NMR of <b>4a</b>           | S12 |
| <sup>13</sup> C NMR of <b>4a</b>          | S13 |

|                                  |     |
|----------------------------------|-----|
| <sup>1</sup> H NMR of <b>4b</b>  | S14 |
| <sup>13</sup> C NMR of <b>4b</b> | S15 |
| <sup>1</sup> H NMR of <b>4c</b>  | S16 |
| <sup>13</sup> C NMR of <b>4c</b> | S17 |
| <sup>1</sup> H NMR of <b>4d</b>  | S18 |
| <sup>13</sup> C NMR of <b>4d</b> | S19 |
| <sup>1</sup> H NMR of <b>4e</b>  | S20 |
| <sup>13</sup> C NMR of <b>4e</b> | S21 |
| <sup>1</sup> H NMR of <b>4f</b>  | S22 |
| <sup>13</sup> C NMR of <b>4f</b> | S23 |
| <sup>1</sup> H NMR of <b>4g</b>  | S24 |
| <sup>13</sup> C NMR of <b>4g</b> | S25 |
| <sup>1</sup> H NMR of <b>4h</b>  | S26 |
| <sup>13</sup> C NMR of <b>4h</b> | S27 |
| <sup>1</sup> H NMR of <b>7</b>   | S28 |
| <sup>13</sup> C NMR of <b>7</b>  | S29 |
| <sup>1</sup> H NMR of <b>8</b>   | S30 |
| <sup>13</sup> C NMR of <b>8</b>  | S31 |
| <sup>1</sup> H NMR of <b>9</b>   | S32 |
| <sup>13</sup> C NMR of <b>9</b>  | S33 |
| <sup>1</sup> H NMR of <b>10</b>  | S34 |
| <sup>13</sup> C NMR of <b>10</b> | S35 |

## General Information.

Unless otherwise stated all reactions were carried out in flame dried glassware under a nitrogen atmosphere using standard inert atmosphere techniques. Diethyl ether and THF were dried using sodium benzophenone stills,  $\text{CH}_2\text{Cl}_2$  and toluene were dried using calcium hydride stills, methanol was dried using a magnesium methoxide still, and *N,N*-dimethylethylamine was distilled from potassium hydroxide under nitrogen.<sup>1</sup> Tri-*n*-butylphosphine, trimethylphosphine (1.0 M solution in toluene), lithium iodide, *n*-butyl lithium (2.5 M in hexane),  $\text{LiAlH}_4$  (1.0 M in  $\text{Et}_2\text{O}$ ) and 2-hydroxypyridine were purchased from Aldrich Chemical Co. and used as received. Iatrobeads (Bioscan, 6RS-8060, 60 $\mu\text{M}$  particle size), and TLC plates (Sorbent Technologies, UV254, 250 $\mu\text{M}$ ) were used as received. Methylphenylketene, methyl-*p*-tolylketene, ethylphenylketene, diphenylketene, 6-methoxy-naphthalenylmethylketene, isobutylphenylketene, ethyl-2-thiophenylketene, and cyclopentylphenylketene were prepared according to literature procedures.<sup>2-4</sup>

NMR spectra were recorded on a Bruker DPX Avance 200 spectrometer (200 MHz for  $^1\text{H}$  and 50 MHz for  $^{13}\text{C}$ ). NMR chemical shifts were reported relative to TMS (0 ppm) for  $^1\text{H}$  and to  $\text{CDCl}_3$  (77.23 ppm) for  $^{13}\text{C}$  spectra.

High resolution mass spectra were obtained from the College of Sciences Major Instrumentation Cluster at Old Dominion University. Low resolution mass spectra were recorded on a GC/MS Hewlett Packard HP 6890 GC instrument with a 5973 mass selective detector. IR spectra were recorded on a Bio Rad FTS-175C spectrometer.

Analytical high performance liquid chromatography (HPLC) was performed using a diode array detector (deuterium lamp, 190-600 nm) using a Daicel Chiralpak AD column (25x 0.46 cm) (Daicel chemical Ind., Ltd.) on a Perkin Elmer 235C instrument, with HPLC-grade isopropanol and hexanes as the eluting solvents.

<sup>1</sup> Armarego, W. L. F.; Perrin, D. D. *Purification of Laboratory Chemicals*, 4<sup>th</sup> ed., Butterworth Heinemann, 2002.

<sup>2</sup> Hodous, B. L.; Fu, G. C. *J. Am. Chem. Soc.* **2002**, *124*, 10006-10007.

<sup>3</sup> Wiskur, S. L.; Fu, G. C. *J. Am. Chem. Soc.* **2005**, *127*, 6176-6177.

<sup>4</sup> Allen, A. D.; Baigrie, L. M.; Gong, L.; Tidwell, T. T. *Can. J. Chem.* **1991**, *69*, 138-145.

**Method A for dimerization of ketoketenes:** Ketoketene (1.39 mmol, 1.0 equiv.) was dissolved in CH<sub>2</sub>Cl<sub>2</sub> (1.4 mL). LiI (0.42 mmol, 0.3 equiv.) was dissolved in Et<sub>2</sub>O (1.4 mL) and was then transferred to the flask containing the ketoketene solution and the resulting solution (0.5 M of ketoketene in solvent) was cooled to 0 °C. Tri-*n*-butylphosphine (0.14 mmol, 0.1 equiv.) was added in one portion, and stirred for the indicated time at the indicated temperature. The reaction was then diluted with CH<sub>2</sub>Cl<sub>2</sub> (5 mL) and quenched by adding deionized water (10 mL). The layers were separated, the aqueous layer was extracted with CH<sub>2</sub>Cl<sub>2</sub> (2 × 5 mL), and the combined organics were dried over anhydrous sodium sulphate. The solvent was removed under reduced pressure to provide the crude product for <sup>1</sup>H NMR/GCMS analysis. 10% EtOAc/hexane (20 mL) and dichloromethane (5 mL) were added to the crude residue, which was passed through a plug column of neutral silica (iatrobeads, 2 × 2 cm, 10 g) and was eluted with 10% EtOAc/Hexane (100 mL). Finally solvent was removed under reduced pressure to yield the desired ketoketene dimer in high purity (≥95%), in most cases, as determined by GCMS and HPLC analysis, and confirmed by <sup>1</sup>H and <sup>13</sup>C NMR spectroscopy.

**Method B for dimerization of ketoketenes:** To a solution of ketoketene in CH<sub>2</sub>Cl<sub>2</sub> (0.5 M), the indicated phosphine (with indicated equivalents) was added at 0 °C or -78 °C. The reaction was stirred at the indicated temperature for the indicated time. The reaction was typically opened to air and stirred for 10 minutes before the solvent was removed under reduced pressure, and the crude product was purified as detailed below.

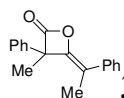

**3-Methyl-3-phenyl-4-(1-phenyl-ethylidene)-oxetan-2-one (4a):** (Method A) Methylphenylketene (197 mg, 1.48 mmol), stirred for 1 hour at 0 °C, and was isolated as a colorless oil (152 mg, 78%). The *Z:E* ratio was determined to be >16:1 by <sup>1</sup>H NMR analysis; IR (thin film) 1881, 1844, 1699, 1140 cm<sup>-1</sup>; <sup>1</sup>H NMR (200 MHz, CDCl<sub>3</sub>, TMS): δ 7.52-7.16 (m, 10H), 1.92 (s, 3H), 1.86 (s, 3H); <sup>13</sup>C NMR (50 MHz, CDCl<sub>3</sub>): δ 171.4, 146.9, 136.2, 135.2, 129.4, 128.6, 128.6, 127.6, 127.4, 126.3, 108.6, 64.4, 19.6, 15.6; MS (EI 70 eV): *m/z* 264, 132, 104, 78; (M<sup>+</sup>+Na) HRMS *m/z* calcd for C<sub>18</sub>H<sub>16</sub>O<sub>2</sub>Na: 287.1043; found: 287.1039.

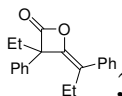

**3-Ethyl-3-phenyl-4-(1-phenyl-propylidene)-oxetan-2-one (4b): (Method A)** Ethylphenylketene (709 mg, 4.85 mmol), stirred for 4 hours at 0 °C, was isolated as a colorless oil (546 mg, 77%). The *Z:E* ratio was determined to be 37:1 by HPLC analysis; IR (thin film): 1857, 1699, 1140cm<sup>-1</sup>; <sup>1</sup>H NMR (200 MHz, CDCl<sub>3</sub>, TMS): δ 7.42-7.20 (m, 10H), 2.38-2.02 (m, 4H), 1.15 (t, *J* = 7.4 Hz, 3H), 0.83 (t, *J* = 7.4 Hz, 3H); <sup>13</sup>C NMR (50 MHz, CDCl<sub>3</sub>): δ 170.9, 143.9, 135.4, 134.7, 129.3, 128.6, 128.2, 127.6, 126.5, 116.5, 70.1, 26.3, 22.9, 12.8, 10.0; (EI 70 eV): *m/z* 292, 146, 117, 103, 91, 77; MS (*M*<sup>+</sup>+Na) HRMS *m/z* calcd for C<sub>20</sub>H<sub>20</sub>O<sub>2</sub>Na: 315.1355; found: 315.1351.

**(-)-3-Ethyl-3-phenyl-4-(1-phenyl-propylidene)-oxetan-2-one ((-)-4b): (Method B):** Ethylphenylketene (57 mg, 0.39 mmol) was dissolved in CH<sub>2</sub>Cl<sub>2</sub> (0.35 mL) and was cooled to -78 °C. (*R,R*)-Binaphane (27 mg, 0.04 mmol) was dissolved in CH<sub>2</sub>Cl<sub>2</sub> (0.35 mL) and cooled to -78 °C. The phosphine solution was then transferred via syringe to the flask containing the ketoketene solution. The reaction was stirred at -78 °C for 48 hours, after which the solvent was removed under reduced pressure. The crude product was treated with dry isopropanol (3 mL) to dissolve the crude ketoketene dimer and precipitate the phosphine. The mixture was filtered under nitrogen using a Schlenk filter stick. The precipitate was washed with dry isopropanol (2 × 3 mL), the phosphine was recovered, and the solvent was removed from the filtrate under reduced pressure. The crude product was then dissolved in 5% EtOAc/hexane (6 mL) and CH<sub>2</sub>Cl<sub>2</sub> (1.5 mL), before being passed through a plug of neutral silica (3.3 g). Elution with 5% EtOAc/hexane (60 mL), followed by solvent removal under reduced pressure yielded a colorless oil (36 mg, 65%). The *Z:E* ratio was determined to be >37:1 by HPLC analysis. HPLC analysis of the purified compound on a Daicel Chiralpak AD column (25 x 0.46 cm), eluted with hexane:isopropanol (98:2), showed that (-)-**4b** was afforded in 80% e.e. (*R*<sub>t1</sub> = 4.1 min, *R*<sub>t2</sub> = 4.9 min with a ratio 9.5: 83.2); [α]<sub>D</sub> = -25.2 °; IR (thin film): 1857, 1699, 1140cm<sup>-1</sup>; <sup>1</sup>H NMR (200 MHz, CDCl<sub>3</sub>, TMS): δ 7.42- 7.20 (m, 10H), 2.38-2.02 (m, 4H), 1.15 (t, *J* = 7.4 Hz, 3H), 0.83 (t, *J* = 7.4 Hz, 3H); <sup>13</sup>C NMR (50 MHz, CDCl<sub>3</sub>): δ 170.9, 143.9, 135.4, 134.7, 129.3, 128.6, 128.2, 127.6, 126.5, 116.5, 70.1, 26.3, 22.9, 12.8, 10.0; (EI 70 eV): *m/z* 292, 146, 117, 103, 91, 77; MS (*M*<sup>+</sup>+Na) HRMS *m/z* calcd for C<sub>20</sub>H<sub>20</sub>O<sub>2</sub>Na: 315.1355; found: 315.1351.

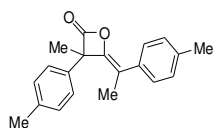

**3-Methyl-3-p-tolyl-4-(1-p-tolyl-ethylidene)-oxetan-2-one (4c):**

**(Method A)** Methyl-*p*-tolylketene (552 mg, 3.78 mmol), stirred for 3 hours at 0 °C, and was isolated as a colorless oil (498 mg, 90%). The *Z:E* ratio was determined to be 39:1 by HPLC analysis; IR (thin film): 1880, 1845, 1698, 1140 cm<sup>-1</sup>; <sup>1</sup>H NMR (200 MHz, CDCl<sub>3</sub>, TMS): δ 7.24-7.09 (m, 8H), 2.27 (s, 6H), 1.87 (s, 3H), 1.81 (s, 3H); <sup>13</sup>C NMR (50 MHz, CDCl<sub>3</sub>): δ 171.7, 146.6, 138.4, 137.3, 133.3, 132.3, 130.0, 129.2, 127.2, 126.1, 108.3, 64.1, 21.3, 21.2, 19.5, 15.5; MS (EI 70 eV) *m/z* 292, 146, 118, 91; (M<sup>+</sup>+Na) HRMS *m/z* calcd for C<sub>20</sub>H<sub>20</sub>O<sub>2</sub>Na: 315.1355; found: 315.1354.

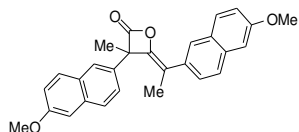

**3-(6-Methoxy-naphthalen-2-yl)-4-[1-(6-methoxy-**

**naphthalen-2-yl)-ethylidene]-3-methyl-oxetan-2-one (4d): (Method A)** 6-Methoxy-naphthylmethyl ketene (266 mg, 1.25 mmol), was stirred for 2 hours at 0 °C, and isolated as an off-white solid (164 mg, 62%). The *Z:E* ratio was determined to be >16:1 by HPLC analysis; mp 179-184 °C; IR (thin film): 1880, 1699cm<sup>-1</sup>; <sup>1</sup>H NMR (200 MHz, CDCl<sub>3</sub>, TMS): δ 7.91-7.57 (m, 9H), 7.19-7.12 (m, 3H), 3.91 (s, 3H), 3.90 (s, 3H), 2.10 (s, 3H), 2.04 (s, 3H); <sup>13</sup>C NMR (50 MHz, CDCl<sub>3</sub>): δ 171.7, 158.4, 158.2, 147.1, 134.4, 133.9, 131.6, 130.3, 129.9, 129.9, 128.9, 128.1, 126.9, 126.1, 125.9, 125.1, 124.5, 119.7, 119.3, 108.6, 105.7, 64.6, 55.5, 29.9, 19.4, 15.5, 14.4; MS (EI 70 eV) *m/z* 424, 378, 212, 184; (M<sup>+</sup>+Na) HRMS *m/z* calcd for C<sub>28</sub>H<sub>24</sub>O<sub>4</sub>Na: 447.1567; found: 447.1564.

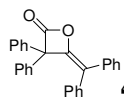

**4-Benzhydrylidene-3,3-diphenyl-oxetan-2-one (4e): (Method B)**

Diphenylketene (269 mg, 1.38 mmol) and Me<sub>3</sub>P (1.0 M in toluene, 277 μL, 0.28 mmol), stirred for 3 days at room temperature. The crude product was triturated with isopropanol to afford an off-white solid (210 mg, 78%); mp 140-144 °C; IR (thin film): 1859, 1671, 1167 cm<sup>-1</sup>; <sup>1</sup>H NMR (200 MHz, CDCl<sub>3</sub>, TMS): δ 7.25-6.68 (m, 20H). <sup>13</sup>C NMR (50 MHz, CDCl<sub>3</sub>): δ 169.8, 148.0, 136.8, 135.9, 130.8, 129.5, 128.9, 128.6, 128.4, 128.2, 128.0, 127.9, 126.5, 118.7, 74.5; MS (EI 70 eV): *m/z*

388, 194, 165, 105; ( $M^+ + Na$ ) HRMS  $m/z$  calcd for  $C_{28}H_{20}O_2Na$ : 411.1355; found: 411.1346.

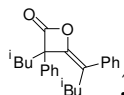

**3-Isobutyl-4-(3-methyl-1-phenyl-butyldiene)-3-phenyl-oxetan-2-one (4f): (Method B)** Isobutylphenylketene (185 mg, 1.06 mmol) and tri-*n*-butylphosphine (27  $\mu$ L, 0.11 mmol), stirred for 4 hours at room temperature, purified through a plug of iatrobeads eluted with 10% EtOAc/hexane, solvent was removed under reduced pressure, was isolated as a colorless oil (155 mg, 84%) which was composed of an inseparable mixture of **4f**:2,4-isobutyl-2,4-phenylcyclobutanedione isomer in the ratio 7:1. The *Z*:*E* ratio of **4f** was determined to be 28:1 by GCMS analysis; IR (thin film): 1870, 1699, 1190  $cm^{-1}$ ;  $^1H$  NMR (200 MHz,  $CDCl_3$ , TMS):  $\delta$  7.52-7.22 (m, 10H), 2.33-1.96 (m, 4H), 1.62-1.41 (m, 2H), 1.07 (d,  $J = 3.8$  Hz, 3H), 1.04 (d,  $J = 3.8$  Hz, 3H), 0.77 (d,  $J = 6.6$  Hz, 3H), 0.45 (d,  $J = 6.6$  Hz, 3H);  $^{13}C$  NMR (50 MHz,  $CDCl_3$ ):  $\delta$  171.5, 136.2, 135.2, 129.1, 128.4, 128.3, 127.5, 126.5, 126.3, 114.6, 68.2, 41.5, 38.1, 26.2, 25.8, 24.4, 23.6, 22.9, 21.6; MS (EI 70 eV):  $m/z$  174, 131, 103; ( $M^+ + Na$ ) HRMS calcd for  $C_{24}H_{28}O_2Na$ : 371.1981; found: 371.1980.

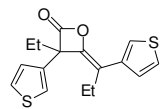

**3-Ethyl-3-thiophen-3-yl-4-(1-thiophen-3-yl-propylidene)-oxetan-2-one (4g): (Method A)** Ethyl(2-thiophenyl)ketene (162 mg, 1.06 mmol), was stirred for 7 hours at 0  $^{\circ}C$ , isolated as a colorless oil (127 mg, 78%). The *Z*:*E* ratio was determined to be 20:1 by HPLC analysis; IR (thin film): 1859, 1695, 1411  $cm^{-1}$ ;  $^1H$  NMR (200 MHz,  $CDCl_3$ , TMS)  $\delta$  7.30-7.16 (m, 4H), 7.05-7.02 (m, 2H), 2.39-2.01 (m, 4H), 1.09 (t,  $J = 7.3$  Hz, 3H), 0.92 (m,  $J = 7.4$  Hz, 3H);  $^{13}C$  NMR (50 MHz,  $CDCl_3$ ):  $\delta$  170.1, 144.5, 136, 135.4, 127.4, 127.1, 126.1, 125.5, 122.6, 122.4, 111.3, 67.5, 26.1, 22.6, 13.5, 9.7; MS (EI 70 eV):  $m/z$  152, 123, 97; ( $M^+ + Na$ ) HRMS  $m/z$  calcd for  $C_{16}H_{16}O_2S_2Na$ : 327.0484; found: 327.0485.

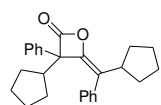

**2-Cyclopentyl-3-(cyclopentyl-phenyl-methylene)-2-phenyl-cyclobutanone (4h): (Method B)** Cyclopentylphenylketene (223 mg, 1.20 mmol),

Me<sub>3</sub>P (1.0 M in toluene, 240  $\mu$ L, 0.24 mmol), stirred for 2 days at room temperature, purified by column chromatography over neutral silica (iatrobeads) with gradient elution 0.5-0.75% EtOAc/hexane, and the solvent was removed under reduced pressure to yield **4h** as a colorless oil (135 mg, 60%), isolated as an inseparable mixture of diastereomers. The *Z:E* ratio was determined to be 3:1 by GCMS analysis; IR (thin film): 1850, 1702, 1118, 1034  $\text{cm}^{-1}$ ; <sup>1</sup>H NMR (200 MHz, CDCl<sub>3</sub>, TMS) for the mixture of diastereomers:  $\delta$  7.48-7.02 (m, 10H), 2.95-2.13 (m, 2H), 2.07-0.80 (m, 10H); <sup>13</sup>C NMR (50 MHz, CDCl<sub>3</sub>) for major diastereomer:  $\delta$  170.7, 145.7, 135.9, 134.2, 130.3, 129.1, 128.8, 128.6, 128.2, 127.7, 127.6, 126.9, 118.5, 71.3, 43.0, 41.2, 30.8, 30.5, 29.7, 28.6, 25.7, 25.6, 25.4, 25.1; MS (EI 70 eV): *m/z* 186, 129, 115, 91, 77; (M<sup>+</sup>+Na) HRMS *m/z* calcd for C<sub>26</sub>H<sub>28</sub>O<sub>2</sub>Na: 395.1982; found: 395.1978.

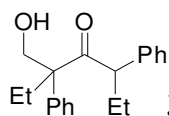

**3-Hydroxymethyl-3,5-diphenyl-heptan-4-one (7) : 4b** (133.6 mg, 0.46 mmol) was dissolved in THF (0.92 mL) and the solution (0.5M) was cooled to -78 °C. After five minutes, LiAlH<sub>4</sub> (1M in Et<sub>2</sub>O, 0.46 mL, 0.46 mmol) was added at -78 °C. The reaction was stirred for 50 min until TLC showed complete consumption of reactant and then the reaction was quenched with MeOH (0.3 mL) at -78 °C. The reaction was worked up with CH<sub>2</sub>Cl<sub>2</sub> (10 mL) and HCl (1M, 10 mL). Aqueous saturated NaCl solution was added to aid separation of the phases. The aqueous phase was extracted with CH<sub>2</sub>Cl<sub>2</sub> (3  $\times$  4 mL), and the combined organic layers were dried over anhydrous Na<sub>2</sub>SO<sub>4</sub>. The solvent was removed under reduced pressure. The resulting crude product was purified on a plug of neutral silica (iatrobeads) using a gradient of solvents from 10% EtOAc/hexane to 20% EtOAc/hexane to afford **7** as a white solid (98.3 mg, 74%), isolated as an inseparable mixture of diastereomers, with a d.r. = 1:1 as determined by GCMS analysis; IR (thin film): 3460, 1697, 1030  $\text{cm}^{-1}$ ; <sup>1</sup>H NMR (200 MHz, CDCl<sub>3</sub>, TMS) for the mixture of diastereomers:  $\delta$  6.83-7.21 (m, 10H), 4.22 (d, *J* = 11.8 Hz, 1H), 3.83 (d, *J* = 11.8 Hz, 1H), 3.51 (dd, *J* = 6.6, 8.4 Hz, 1H), 2.24-2.15 (m, 2H), 1.8 - 1.71 (m, 2H), 0.91 (t, *J* = 7.4 Hz, 3H), 0.59 (t, *J* = 7.4 Hz, 3H); <sup>13</sup>C NMR (50 MHz, CDCl<sub>3</sub>) for the mixture of diastereomers:  $\delta$  213.4, 139.4, 137.9, 128.8, 128.5, 128.0, 127.9, 127.5, 126.8, 63.7, 61.8, 56.1, 28.5, 23.5, 12.1, 8.6; MS (EI 70 eV):



m/z 266, 147, 119, 91, 77; ( $M^+ + Na$ ) HRMS m/z calcd for  $C_{20}H_{24}O_2Na$ : 319.1669; found: 319.1662.

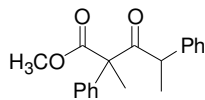

**2-Methyl-3-oxo-2,4-diphenyl-pentanoic acid methyl ester (8):**

*n*-BuLi (2.5 M in hexane, 0.2 ml, 0.5 mmol) was added to a stirred solution of MeOH (2.06 mmol, 83  $\mu$ L) in THF (1.85 mL) at 0 °C and stirred for 10 min. Compound **4a** (136.0 mg, 0.51 mmol) was dissolved in THF (5 mL) and the solution was now added dropwise to the solution of MeOLi at 0 °C. The reaction was stirred for 85 min until TLC showed complete consumption of reactant. Then the reaction was quenched with HCl (1M, 10 mL) and the layers were separated. The aqueous layer was extracted with  $CH_2Cl_2$  ( $3 \times 10$  mL), and the combined organics were dried over  $Na_2SO_4$ . The solvent was removed under reduced pressure. The resulting product **8** was obtained quantitatively as a colorless oil, isolated as an inseparable mixture of diastereomers, with a d.r. = 1.6:1.0 as determined by GCMS analysis; IR (thin film): 1716, 1251, 1208  $cm^{-1}$ ;  $^1H$  NMR (200 MHz,  $CDCl_3$ , TMS) for the mixture of diastereomers:  $\delta$  7.26-6.99 (m, 8H), 6.83-6.78 (m, 2H), 3.95 (q,  $J$  = 7 Hz, 1H), 3.85 (q,  $J$  = 6.8 Hz, 1H), 3.71 (s, 3H), 3.42 (s, 3H), 1.66 (s, 3H), 1.61 (s, 3H), 1.31 (d,  $J$  = 7.0 Hz, 3H), 1.24 (d,  $J$  = 7.0 Hz, 3H);  $^{13}C$  NMR (50 MHz,  $CDCl_3$ ) for the mixture of diastereomers:  $\delta$  208.2, 207.5, 172.9, 172.3, 141.4, 138.3, 137.5, 128.6, 128.5, 128.1, 128.0, 128.0, 127.5, 127.0, 126.7, 65.5, 65.4, 52.7, 52.5, 49.7, 49.5, 29.9, 22.4, 22.2, 21.9, 21.5; MS (EI 70 eV): m/z 296, 164, 132, 105, 77; ( $M^+ + Na$ ) HRMS m/z calcd for  $C_{19}H_{20}O_3Na$ : 319.1305; found: 319.1298.

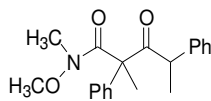

**2-Methyl-3-oxo-2,4-diphenyl-pentanoic acid methoxy-methyl-**

**amide (9):** **4a** (117.7 mg, 0.45 mmol) was dissolved in  $CH_2Cl_2$  (2.23 mL, 0.2 M). After a few minutes the Weinreb amine (0.89 mmol, 65  $\mu$ L) and 2-Hydroxypyridine (0.05 mmol, 4.2 mg) were added. The reaction was stirred for 4 days until TLC showed complete consumption of reactant and then the reaction was quenched with  $H_2O$  (10 mL). The layers were separated and the aqueous phase was extracted with  $CH_2Cl_2$  ( $3 \times 10$  mL). The combined organic layers were dried over anhydrous  $Na_2SO_4$  and the solvent was removed under reduced pressure. The resulting crude product was purified by flash column chromatography on neutral

silica (Iatrobeds, 12.5 g) using a gradient of solvents from 5% EtOAc/hexane to 15% EtOAc/hexane to afford **9** as a solidifying white oil (106.1 mg, 90%), isolated as an inseparable mixture of diastereomers, with a d.r. = 1.4:1.0 as determined by GCMS analysis; IR (thin film): 1714, 1652, 1180  $\text{cm}^{-1}$ ;  $^1\text{H}$  NMR (200 MHz,  $\text{CDCl}_3$ , TMS) for the mixture of diastereomers:  $\delta$  7.31-6.86 (m, 10H), 4.02-3.89 (m, 1H), 3.16 (s, 3H), 3.06 (s, 1H), 3.04 (s, 1H), 2.97 (s, 1H), 1.71 (s, 3H), 1.53 (s, 3H), 1.32 (d,  $J$  = 6.8 Hz, 3H), 1.30 (d,  $J$  = 6.8 Hz, 3H);  $^{13}\text{C}$  NMR (50 MHz,  $\text{CDCl}_3$ ) for the mixture of diastereomers:  $\delta$  207.4, 206.9, 141.7, 141.2, 139.6, 138.6, 128.7, 128.4, 128.3, 128.1, 128.1, 127.8, 127.6, 127.2, 127.0, 126.6, 64.5, 64.2, 59.9, 59.6, 50.1, 49.3, 33.6, 23.1, 21.9, 21.7, 21.5; MS (EI 70 eV):  $m/z$  325, 193, 162, 132, 105, 77; ( $\text{M}^+$ +Na) HRMS  $m/z$  calcd for  $\text{C}_{20}\text{H}_{23}\text{NO}_3\text{Na}$ : 348.1570; found: 348.1564.

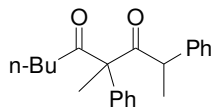

**4-Methyl-2,4-diphenyl-nonane-3,5-dione (10): 4a** (160 mg, 0.61 mmol) was dissolved in THF (4.8 mL), and *n*-BuLi (2.5 M in hexane, 0.48 mL, 1.2 mmol) was added dropwise over five minutes at  $-78^\circ\text{C}$ , stirred for 15 min and was quenched by adding water (2 mL) at  $-78^\circ\text{C}$ . The reaction was then warmed up to room temperature, brine (8 mL) and  $\text{CH}_2\text{Cl}_2$  (5 mL) were added, and the layers were separated. The aqueous layer was extracted with  $\text{CH}_2\text{Cl}_2$  ( $2 \times 5$  mL), the combined organics were dried over anhydrous  $\text{Na}_2\text{SO}_4$  and the solvent was removed under reduced pressure to yield a colorless oil (148 mg, 93%), isolated as an inseparable mixture of diastereomers, with a d.r. = 8:1 by GCMS analysis; IR (thin film): 1712  $\text{cm}^{-1}$ ;  $^1\text{H}$  NMR (200 MHz,  $\text{CDCl}_3$ , TMS) for the major diastereomer:  $\delta$  7.29-6.74 (m, 10H), 3.88 (q,  $J$  = 6.8 Hz, 1H), 2.47-2.15 (m, 2H), 1.56 (s, 3H), 1.51-1.39 (m, 2H), 1.31 (d,  $J$  = 6.8 Hz, 3H), 1.24-1.10 (m, 2H), 0.77 (t,  $J$  = 7.2 Hz, 3H);  $^{13}\text{C}$  NMR (50 MHz,  $\text{CDCl}_3$ ) for the major diastereomer:  $\delta$  210.8, 210.7, 141.0, 137.7, 128.9, 129.2, 128.7, 128.6, 128.1, 128.0, 127.0, 126.4, 70.6, 49.8, 39.3, 26.3, 22.4, 21.3, 19.9, 14.7; MS (EI 70 eV):  $m/z$  322, 238, 190, 132, 105, 77; ( $\text{M}^+$ +Na) HRMS  $m/z$  calcd for  $\text{C}_{22}\text{H}_{26}\text{O}_2\text{Na}$ : 345.1825; found: 345.1819.

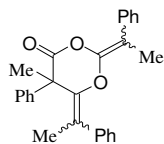

**5,5-Dimethyl-2,6-bis-(1-phenyl-ethylidene)-[1,3]dioxan-4-one(5a):**  $^1\text{H}$  NMR (200 MHz,  $\text{CDCl}_3$ , TMS):  $\delta$  7.44-6.92 (m, 15H), 2.02 (s, 3H), 1.83 (s, 3H), 1.36 (s, 3H); selected signals from  $^{13}\text{C}$  NMR (50 MHz,  $\text{CDCl}_3$ ):  $\delta$  168.3, 144.4, 143.7, 141.6, 139.6, 137.3, 136.2, 135.2, 128.4, 128.1, 127.6, 127.2, 126.6, 120.6, 98.1, 54.2, 25.0, 19.3, 15.0; MS (EI 70 eV):  $m/z$  396, 221, 132, 104.

# NMR Spectra

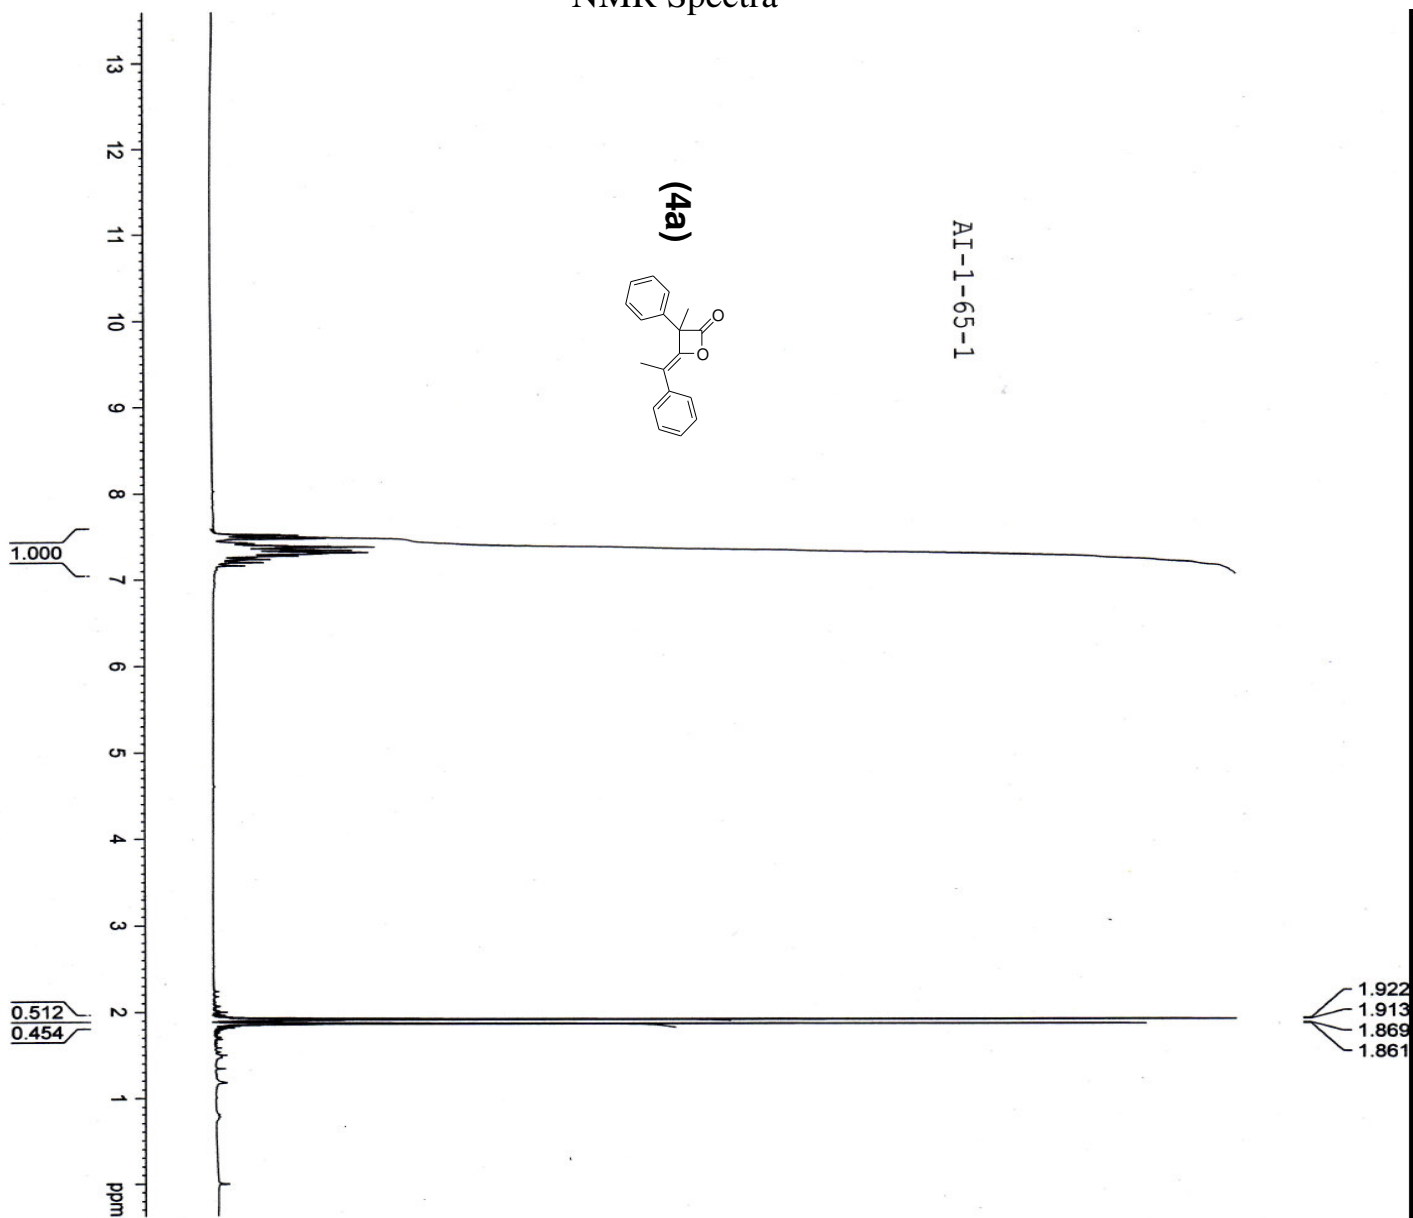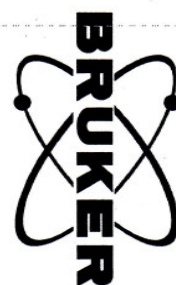

Current Data Parameters  
 NAME Ahmad  
 EXPNO 57  
 PROCNO 1

F2 - Acquisition Parameters  
 Date\_ 20070604  
 Time 11.14  
 INSTRUM spect  
 PROBD 5 mm Multinu  
 PULPROG zg  
 TD 4096  
 SOLVENT CDCl3  
 NS 16  
 DS 2  
 SWH 2796.421 Hz  
 FIDRES 0.682720 Hz  
 AQ 0.7324148 sec  
 RG 203.2  
 DW 178.800 usec  
 DE 6.00 usec  
 TE 300.0 K  
 D1 1.00000000 sec

===== CHANNEL f1 =====  
 NUC1 1H  
 P1 10.00 usec  
 PL1 -3.00 dB  
 SFO1 200.1313509 MHz  
 F2 - Processing parameters  
 SI 32768  
 SF 200.1300282 MHz  
 WDW EM  
 SSB 0  
 LB 0.03 Hz  
 GB 0  
 PC 1.00

AI-1-65-1

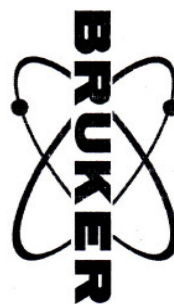

Current Data Parameters  
NAME Ahmad  
EXPNO 72  
PROCNO 1

F2 - Acquisition Parameters  
Date\_ 20070619  
Time 8.00  
INSTRUM spect  
PROBHD 5 mm Multinu  
PULPROG zgdc  
TD 37686  
SOLVENT CDCl3  
NS 9500  
DS 4  
SWH 12562.814 Hz  
FIDRES 0.333355 Hz  
AQ 1.4999528 sec  
RG 90.5  
DW 39.800 usec  
DE 6.00 usec  
TE 300.0 K  
D1 4.00000000 sec  
d11 0.03000000 sec

===== CHANNEL f1 =====  
NUC1 13C  
P1 6.00 usec  
PL1 1.00 dB  
SFO1 50.3285046 MHz

===== CHANNEL f2 =====  
CPDPRG2 waltz16  
NUC2 1H  
PCPD2 100.00 usec  
PL2 -4.00 dB  
PL12 16.72 dB  
SFO2 200.1300000 MHz

F2 - Processing parameters  
SI 32768  
SF 50.3227316 MHz  
WDW EM  
SSB 0  
LB 3.00 Hz  
GB 0  
PC 1.40

171.382  
146.863  
136.218  
135.212  
129.365  
128.596  
127.624  
127.382  
126.251  
108.644  
77.866  
77.231  
76.596  
64.438  
19.607  
15.570

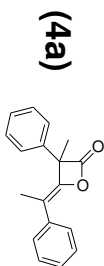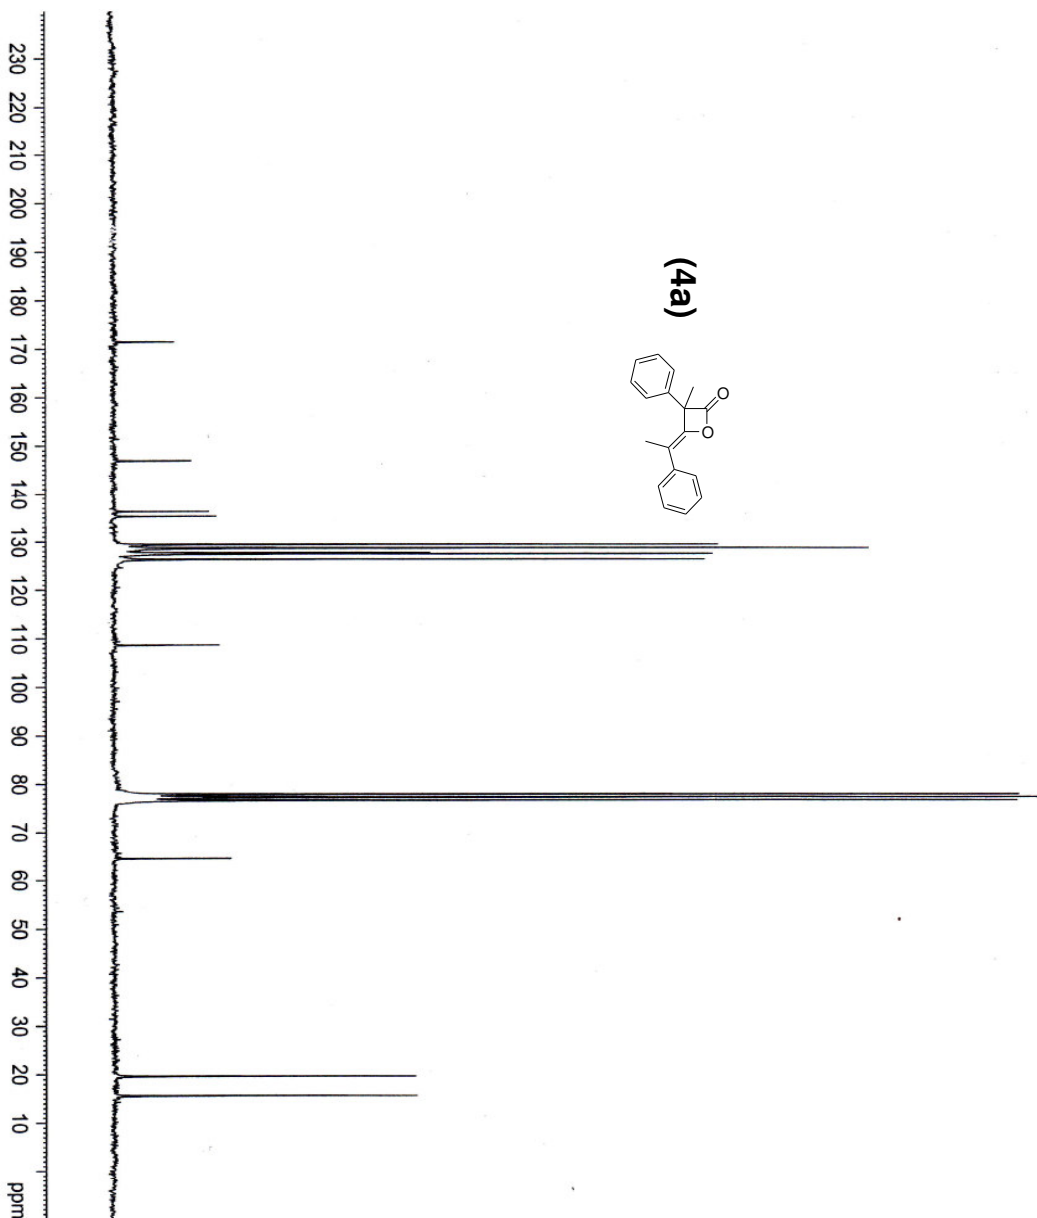

7.436  
7.423  
7.414  
7.402  
7.386  
7.373  
7.363  
7.349  
7.343  
7.333  
7.321  
7.308  
7.298  
7.292  
7.279  
7.271  
7.258  
7.242  
7.234  
7.225  
7.214  
7.199  
7.183  
7.159  
2.388  
2.351  
2.343  
2.334  
2.316  
2.306  
2.297  
2.280  
2.268  
2.260  
2.244  
2.231  
2.224  
2.157  
2.121  
2.085  
2.049  
1.184  
1.147  
1.138  
1.131

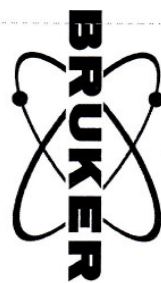

Current Data Parameters  
NAME G Harzmann  
EXPNO 68  
PROCNO 1

F2 - Acquisition Parameters  
Date\_ 20080319  
Time 20.17

INSTRUM spect  
PROBHD 5 mm Multinu  
PULPROG zg  
TD 4096  
SOLVENT CDCl3  
NS 16  
DS 2

SWH 2796.421 Hz  
FIDRES 0.682720 Hz  
AQ 0.7324148 sec  
RG 812.7

DW 178.800 usec  
DE 6.00 usec  
TE 300.0 K  
D1 3.00000000 sec

===== CHANNEL f1 =====  
NUC1 1H  
P1 10.00 usec  
PL1 -3.00 dB  
SFO1 200.1313509 MHz

F2 - Processing parameters  
SI 32768  
SF 200.1300287 MHz  
WDW EM  
SSB 0  
LB 0.03 Hz  
GB 0  
PC 1.00

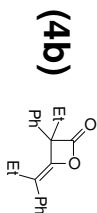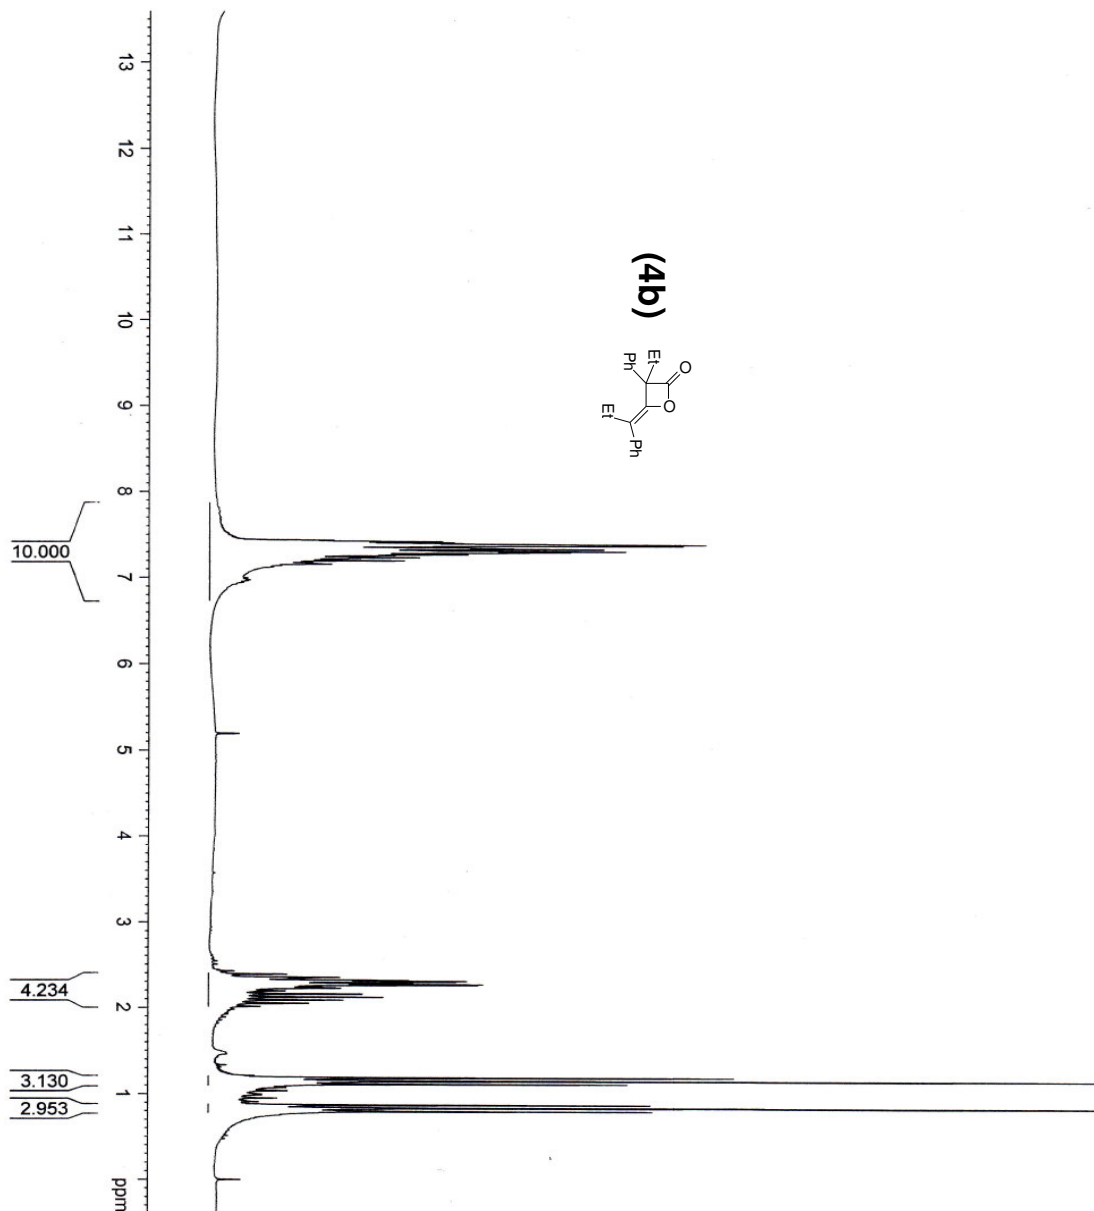

GH-1-81-1

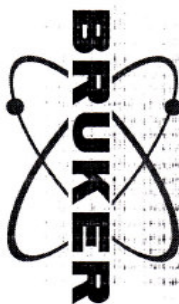

Current Data Parameters  
NAME G Harzmann  
EXPNO 69  
PROCNO 1

F2 - Acquisition Parameters

Date 20080320  
Time 10.53  
INSTRUM spect  
PROBHD 5 mm Multinu  
PULPROG zgdc  
TD 37686  
SOLVENT CDC13  
NS 9500  
DS 4  
SWH 12562.814 Hz  
FIDRES 0.333355 Hz  
AQ 1.4999528 sec  
RG 90.5  
RW 39.800 usec  
DE 6.00 usec  
TE 300.0 K  
D1 4.00000000 sec  
d11 0.03000000 sec

===== CHANNEL f1 =====

NUC1 13C  
P1 6.00 usec  
PL1 1.00 dB  
SFO1 50.3285046 MHz

===== CHANNEL f2 =====

CPDPRG2 waltz16  
NUC2 1H  
PCPD2 100.00 usec  
PL2 -4.00 dB  
PL12 16.72 dB  
SFO2 200.1300000 MHz

F2 - Processing parameters

SI 32768  
SF 50.3227212 MHz  
WDW EM  
SSB 0  
LB 3.00 Hz  
GB 0  
PC 1.40

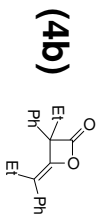

170.869  
143.955  
135.358  
134.694  
129.271  
128.617  
128.221  
127.617  
126.455  
116.475

77.867  
77.232  
76.597  
70.138

26.322  
22.926  
12.765  
9.960

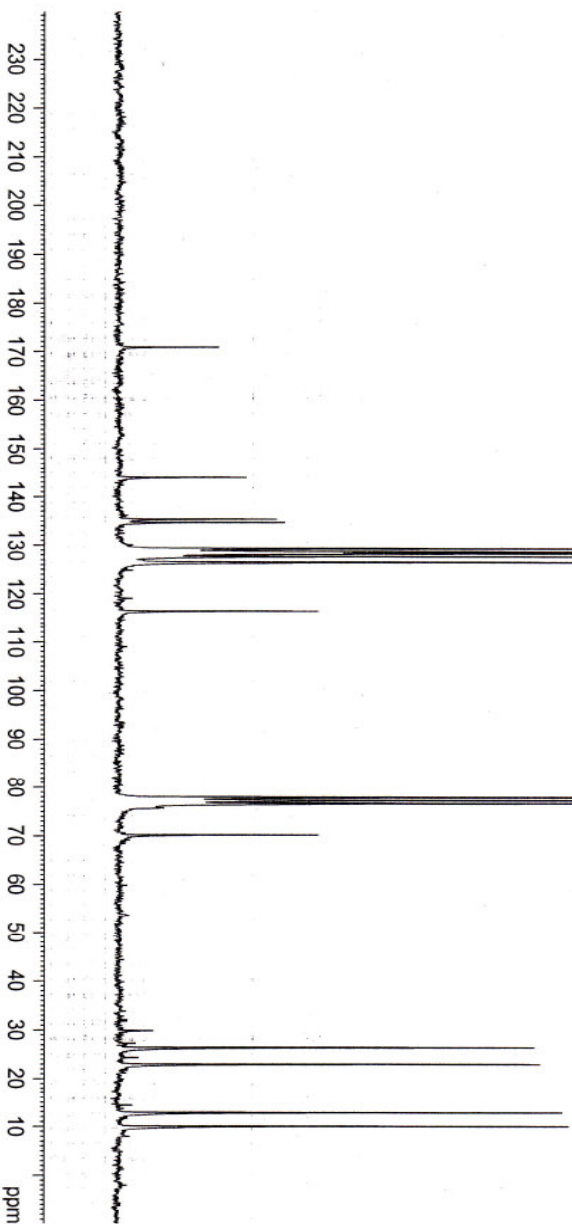

GH1-58-1

7.242  
7.132  
7.092

2.266  
1.866  
1.813

(4c)

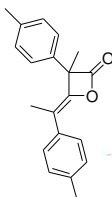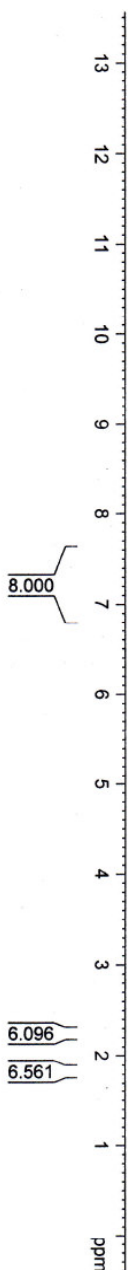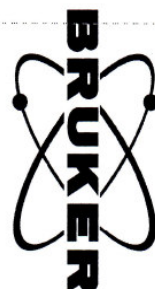

Current Data Parameters  
NAME G Harzmann  
EXPNO 45  
PROCNO 1

F2 - Acquisition Parameters  
Date\_ 20080212  
Time\_ 12.58  
INSTRUM spect  
PROBHD 5 mm Multinu  
PULPROG zg  
TD 4096  
SOLVENT CDCl3  
NS 16  
DS 2  
SWH 2796.421 Hz  
FIDRES 0.682720 Hz  
AQ 0.7324148 sec  
RG 114  
DW 178.800 usec  
DE 6.00 usec  
TE 300.0 K  
D1 1.00000000 sec

===== CHANNEL f1 =====  
NUC1 1H  
P1 10.00 usec  
PL1 -3.00 dB  
SFO1 200.1313509 MHz

F2 - Processing parameters  
SI 32768  
SF 200.1300329 MHz  
WDW EM  
SSB 0  
LB 0.03 Hz  
GB 0  
PC 1.00



GH1-58-1 (Carbon)

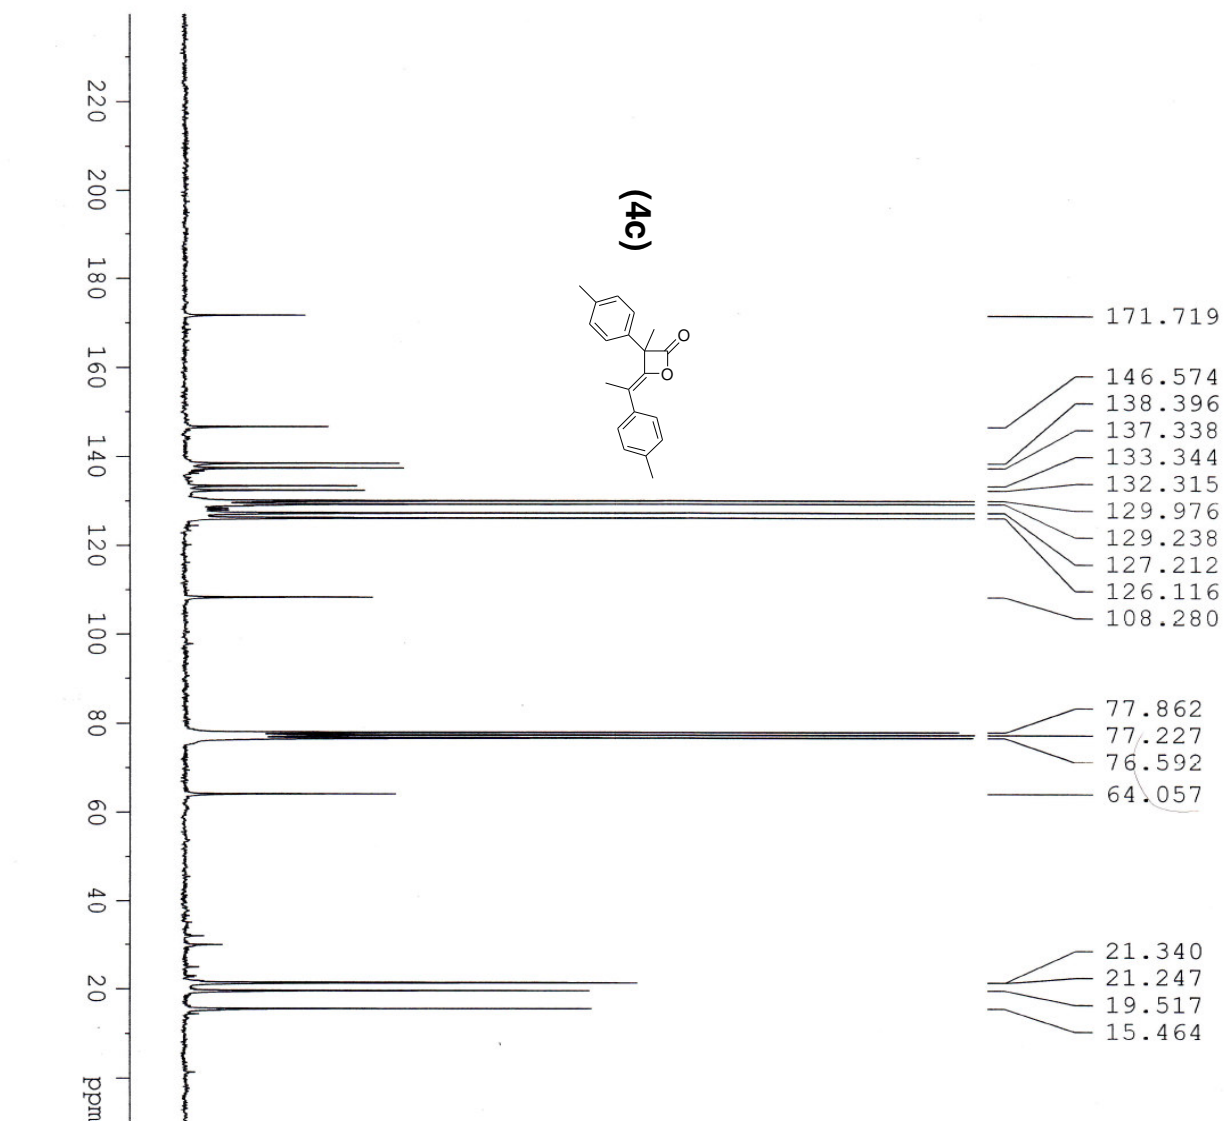

Current Data Parameters  
 NAME G Harzmann  
 EXPNO 46  
 PROCNO 1

# F2 - Acquisition Parameters

Date\_ 20080212  
 Time 10.03  
 INSTRUM spect  
 PROBHD 5 mm Multinu  
 PULPROG zgdc  
 TD 37686  
 SOLVENT DMSO  
 NS 9500  
 DS 4  
 SWH 12562.814 Hz  
 FIDRES 0.333355 Hz  
 AQ 1.4999528 sec  
 RG 90.5  
 DW 39.800 usec  
 DE 6.00 usec  
 TE 300.0 K  
 D1 4.00000000 sec  
 d11 0.03000000 sec

# ===== CHANNEL f1 =====

NUC1 13C  
 P1 6.00 usec  
 PL1 1.00 dB  
 SFO1 50.3285046 MHz

# ===== CHANNEL f2 =====

CPDPRG2 waltz16  
 NUC2 1H  
 PCPD2 100.00 usec  
 PL2 -4.00 dB  
 PL12 16.72 dB  
 SFO2 200.1300000 MHz

# F2 - Processing parameters

SI 32768  
 SF 50.3227235 MHz  
 WDM EM  
 SSB 0  
 LB 3.00 Hz  
 GB 0  
 PC 1.40

nk1-28-1

7.910  
7.850  
7.842  
7.795  
7.780  
7.761  
7.719  
7.575  
7.566  
7.190  
7.165  
7.146  
7.125

3.913  
3.903  
3.895  
3.881

2.100  
2.091  
2.085  
2.042  
2.035  
2.013  
2.004

0.007  
0.000

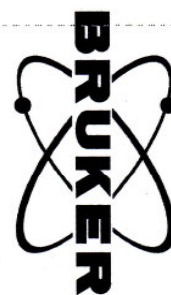

Current Data Parameters  
NAME N\_Kerigan  
EXPNO 32  
PROCNO 1

F2 - Acquisition Parameters  
Date\_ 20080302  
Time 20.32

INSTRUM spect  
PROBHD 5 mm Multinu  
PULPROG zg  
TD 4096  
SOLVENT CDCl3  
NS 16  
DS 2

SWH 2796.421 Hz  
FIDRES 0.682720 Hz  
AQ 0.7324148 sec

RG 90.5  
DE 178.800 usec  
TE 300.0 K  
D1 1.00000000 sec

===== CHANNEL f1 =====  
NUC1 1H  
P1 10.00 usec  
PL1 -3.00 dB  
SFO1 200.1313509 MHz

F2 - Processing parameters  
SI 32768  
SF 200.1300148 MHz  
WDW EM  
SSB 0  
LB 0.03 Hz  
GB 0  
PC 1.00

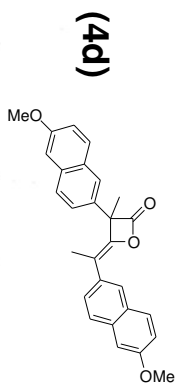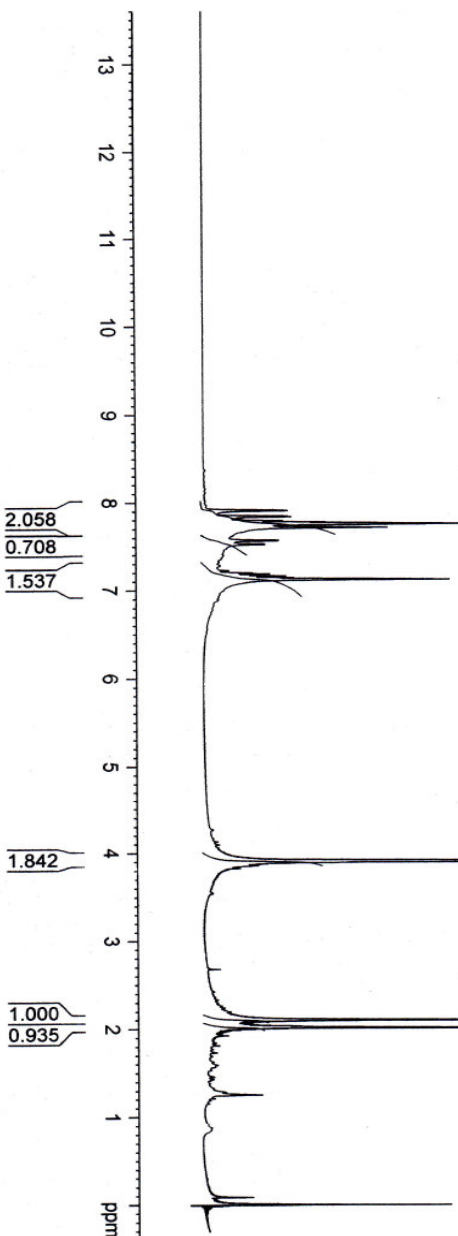

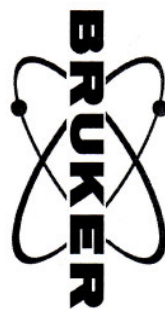

nk1-28-1 carbon

171.707  
158.452  
158.163  
147.114  
134.444  
133.881  
131.524  
130.257  
129.949  
129.857  
128.925  
128.132  
126.925  
126.096  
125.960  
125.149  
124.522  
119.705  
119.293  
108.587  
105.734  
77.868  
77.234  
76.598  
75.525  
64.609  
55.504  
29.896  
19.383  
15.539  
14.393  
1.237  
0.202

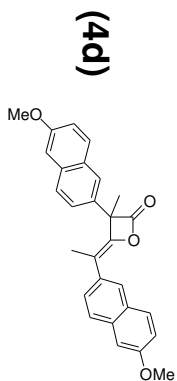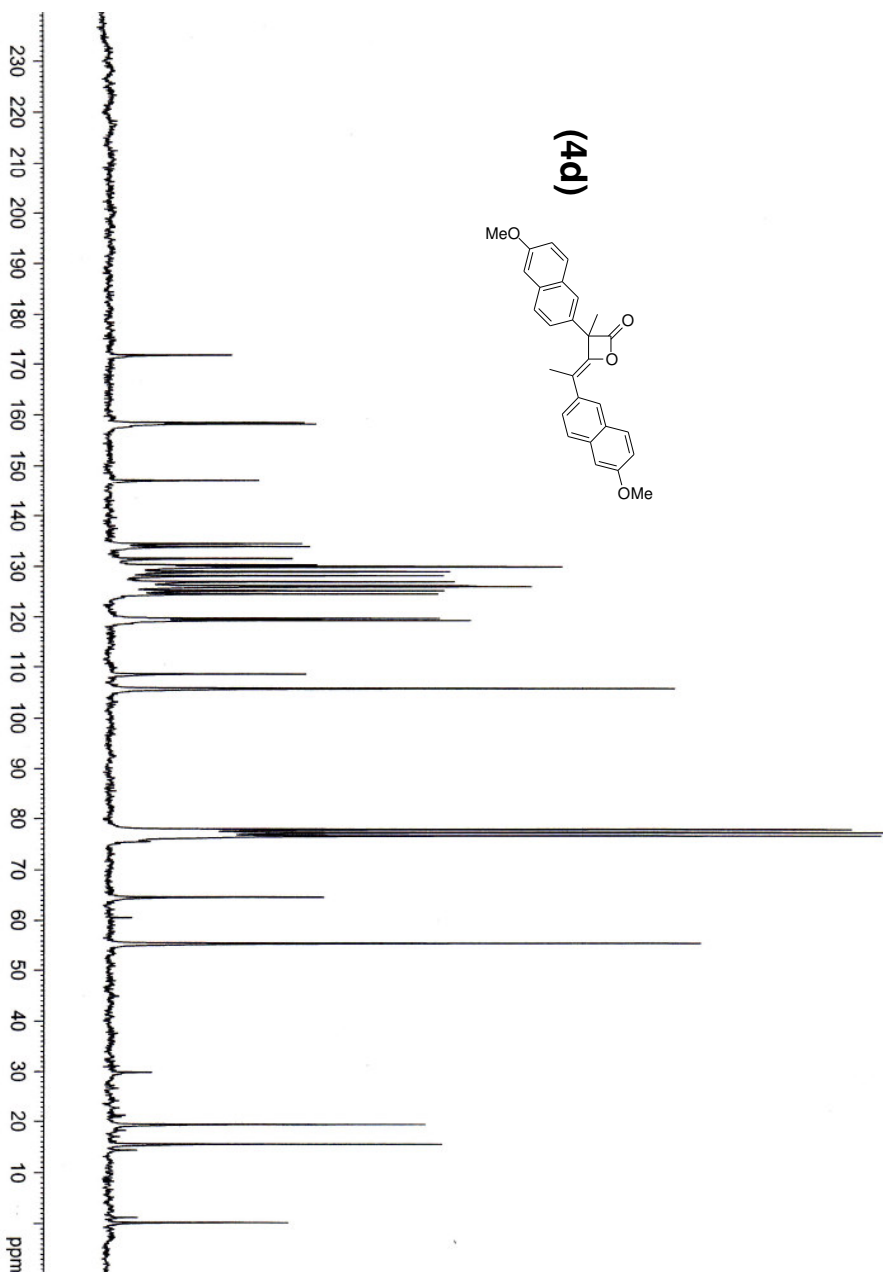

Current Data Parameters  
NAME N\_Kerriyan  
EXPNO 33  
PROCNO 1

F2 - Acquisition Parameters  
Date\_ 20080303  
Time 11.14

INSTRUM spect  
PROBHD 5 mm Multinu  
PULPROG zgpg  
TD 37686  
SOLVENT DMSO  
NS 5500

DS 4  
SWH 12562.814 Hz  
FIDRES 0.33335 Hz  
AQ 1.499528 sec

RG 57  
DE 39.800 usec  
TE 300.0 K  
D1 4.00000000 sec  
d11 0.03000000 sec

===== CHANNEL f1 =====  
NUC1 13C  
P1 6.00 usec  
PL1 1.00 dB  
SFO1 50.3285046 MHz

===== CHANNEL f2 =====  
CPDPRG2 waltz16  
NUC2 1H  
PCPD2 100.00 usec  
PL2 -4.00 dB  
PL12 16.72 dB  
SFO2 200.1300000 MHz

F2 - Processing parameters  
SI 32768  
SF 50.3227220 MHz  
WDW EM  
SSB 0  
LB 3.00 Hz  
GB 0  
PC 1.40

7.254  
7.244  
7.228  
7.213  
7.203  
7.189  
7.177  
7.161  
7.154  
7.065  
7.056  
7.039  
7.024  
7.016  
6.985  
6.712  
6.677

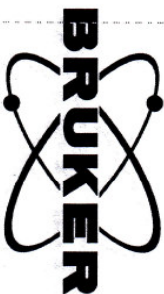

Current Data Parameters  
NAME N\_Kerrigan  
EXNO 1  
PROCNO 1

F2 - Acquisition Parameters

Date\_ 20061210  
Time\_ 19.45  
INSTRUM spect  
PROBHD 5 mm Multinu  
PULPROG zg  
TD 4096  
SOLVENT CDCl3  
NS 16  
DS 2  
SWH 2796.421 Hz  
FIDRES 0.682720 Hz  
AQ 0.7324148 sec  
RG 90.5  
DW 178.800 usec  
DE 6.00 usec  
TE 300.0 K  
D1 1.00000000 sec

===== CHANNEL f1 =====

NUC1 1H  
P1 10.00 usec  
PL1 -3.00 dB  
SFO1 200.1313509 MHz

F2 - Processing parameters

SI 32768  
SF 200.1300402 MHz  
WDW EM  
SSB 0  
LB 0.03 Hz  
GB 0  
PC 1.00

nk1-1-1

(4e)

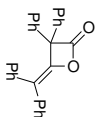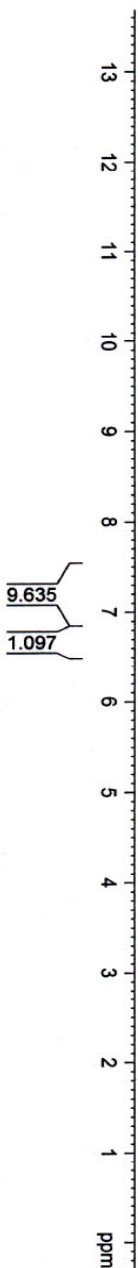

diphenylketene dimer

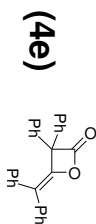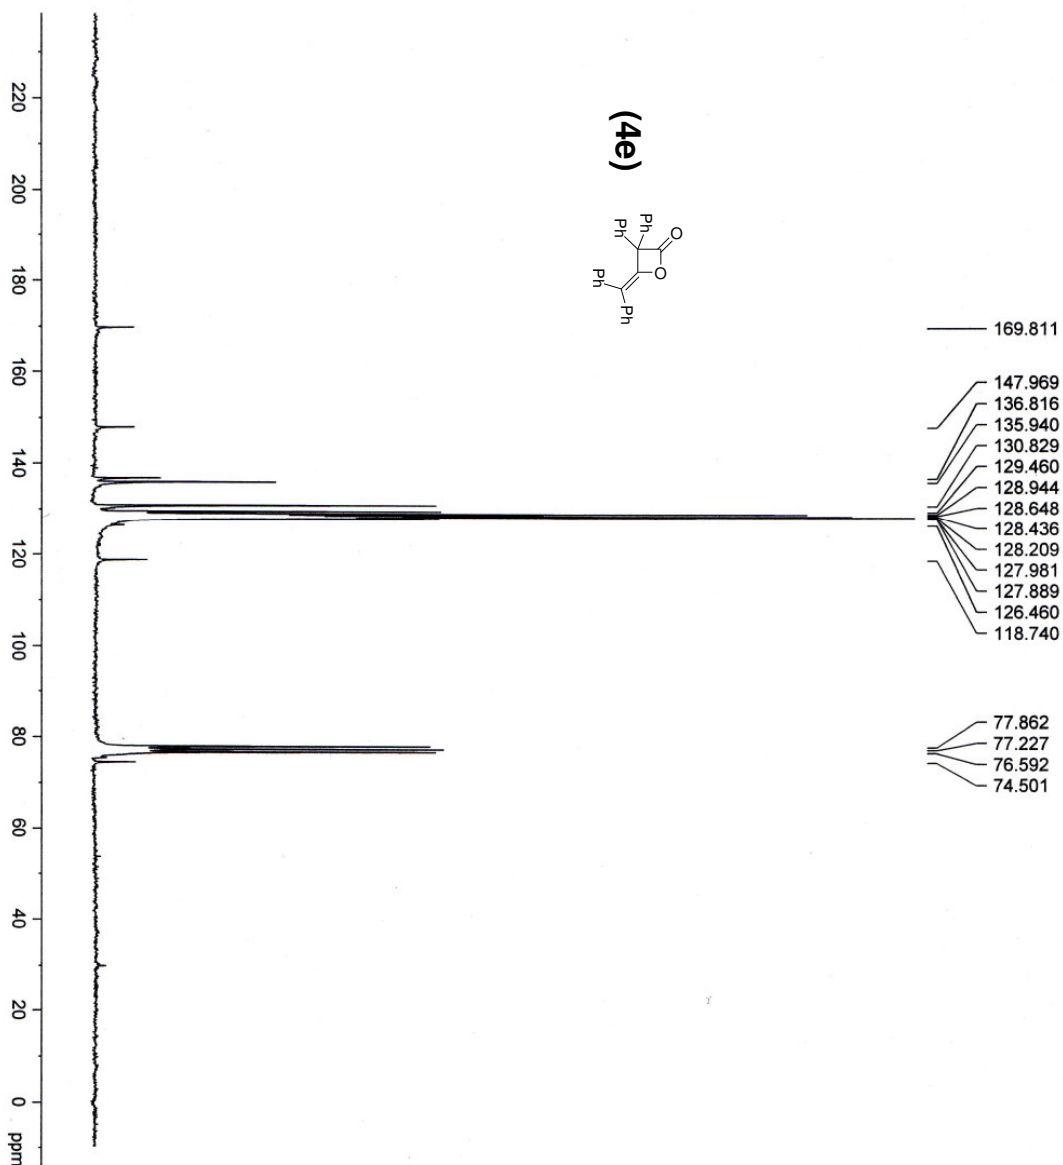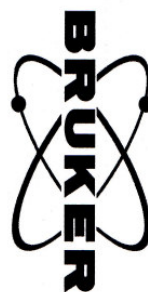

Current Data Parameters  
NAME N-Kerrigan  
EXPNO 19  
PROCNO 1

F2 - Acquisition Parameters

Date\_ 20080125  
Time 9.50  
INSTRUM spect  
PROBHD 5 mm Multinu  
PULPROG zgdc  
TD 37686  
SOLVENT DMSO  
NS 9500  
DS 4  
SWH 12562.814 Hz  
FIDRES 0.33335 Hz  
AQ 1.4999528 sec  
RG 71.8  
DW 39.800 usec  
DE 6.00 usec  
TE 300.0 K  
D1 4.00000000 sec  
d11 0.03000000 sec

===== CHANNEL f1 =====  
NUC1 13C  
P1 6.00 usec  
PL1 1.00 dB  
SFO1 50.3285046 MHz

===== CHANNEL f2 =====  
CPDPRG2 waltz16  
NUC2 1H  
PCPD2 100.00 usec  
PL2 -4.00 dB  
PL12 16.72 dB  
SFO2 200.1300000 MHz

F2 - Processing parameters  
SI 32768  
SF 50.3227220 MHz  
WDW EM  
SSB 0  
LB 3.00 Hz  
GB 0  
PC 1.40



nk1-20-1

7.524  
7.514  
7.504  
7.481  
7.475  
7.460  
7.452  
7.443  
7.431  
7.423  
7.411  
7.399  
7.393  
7.381  
7.360  
7.332  
7.305  
7.296  
7.286  
7.263  
7.247  
7.239  
7.219  
2.331  
2.297  
2.289  
2.259  
2.252  
2.242  
2.230  
2.216  
2.205  
2.171  
2.160  
2.146  
2.136  
2.105  
2.089  
2.074  
2.049  
2.033  
2.023  
2.017  
1.989  
1.585  
1.544  
1.513

(4f)

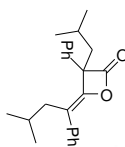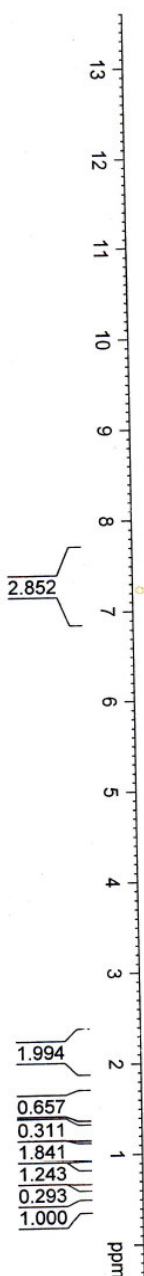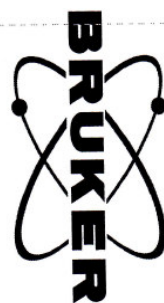

Current Data Parameters  
NAME N\_Kerrigan  
EXPNO 24  
PROCNO 1

F2 - Acquisition Parameters

Date\_ 20080222  
Time\_ 18.45  
INSTRUM spect  
PROBHD 5 mm Multinu  
PULPROG zg  
TD 4096  
SOLVENT CDCl<sub>3</sub>  
NS 16  
DS 2  
SWH 2796.421 Hz  
FIDRES 0.682720 Hz  
AQ 0.7324148 sec  
RG 181  
DW 178.800 usec  
DE 6.00 usec  
TE 300.0 K  
D1 1.00000000 sec

===== CHANNEL f1 =====  
NUC1 1H  
P1 10.00 usec  
PL1 -3.00 dB  
SFO1 200.1313509 MHz

F2 - Processing parameters  
SI 32768  
SF 200.1300110 MHz  
WDW EM  
SSB 0  
LB 0.03 Hz  
GB 0  
PC 1.00

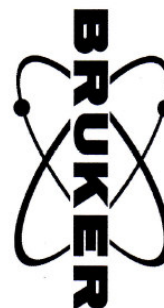

nk1-20-1

|         |
|---------|
| 171.541 |
| 145.970 |
| 136.226 |
| 135.188 |
| 129.145 |
| 128.445 |
| 128.285 |
| 127.467 |
| 126.512 |
| 126.302 |
| 114.636 |
| 77.869  |
| 77.234  |
| 76.598  |
| 68.203  |
| 41.486  |
| 38.121  |
| 26.150  |
| 25.840  |
| 24.360  |
| 23.601  |
| 23.291  |
| 22.868  |
| 22.254  |
| 22.149  |
| 21.606  |
| 14.105  |
| 13.994  |

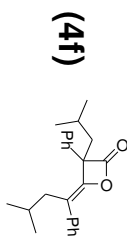

220 210 200 190 180 170 160 150 140 130 120 110 100 90 80 70 60 50 40 30 20 10 0 ppm

Current Data Parameters  
NAME N\_Kerrigan  
EXPNO 26  
PROCNO 1

F2 - Acquisition Parameters  
Date\_ 20080224  
Time\_ 12.00  
INSTRUM spect  
PROBHD 5 mm Multinu  
PULPROG zgdc  
TD 37686  
SOLVENT CDCl3  
NS 9500  
DS 4  
SWH 12562.814 Hz  
FIDRES 0.33335 Hz  
AQ 1.4999528 sec  
RG 57  
DM 39.800 usec  
DE 6.00 usec  
TE 300.0 K  
D1 4.00000000 sec  
d11 0.03000000 sec

===== CHANNEL f1 =====  
NUC1 13C  
P1 6.00 usec  
PL1 1.00 dB  
SFO1 50.3285046 MHz

===== CHANNEL f2 =====  
CPDPRG2 waltz16  
NUC2 1H  
PCPD2 100.00 usec  
PL2 -4.00 dB  
PL12 16.72 dB  
SFO2 200.1300000 MHz

F2 - Processing parameters  
SI 32768  
SF 50.3227247 MHz  
WDW EM  
SSB 0  
LB 3.00 Hz  
GB 0  
PC 1.40

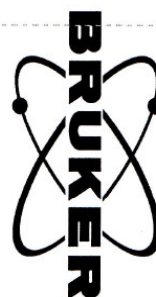

nk1-41-1  
7.312  
7.297  
7.283  
7.273  
7.265  
7.257  
7.243  
7.234  
7.226  
7.219  
7.211  
7.182  
7.069  
7.061  
7.044  
7.036  
2.370  
2.334  
2.299  
2.291  
2.262  
2.254  
2.247  
2.240  
2.224  
2.218  
2.208  
2.196  
2.182  
2.169  
2.154  
2.146  
2.132  
2.097  
2.061  
1.497  
1.185  
1.142  
1.128  
1.121  
1.114  
1.105  
1.097  
1.090  
1.083  
1.069  
1.054  
1.047  
1.040  
1.034

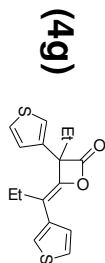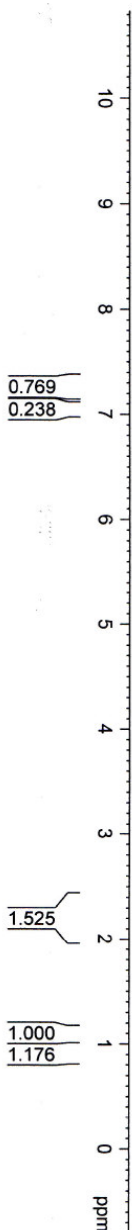

Current Data Parameters  
NAME N\_Kerrigan  
EXNO 53  
PROCNO 1

F2 - Acquisition Parameters  
Date\_ 20080909  
Time 18.45  
INSTRUM spect  
PROBHD 5 mm Multinu  
PULPROG zg  
TD 4096  
SOLVENT CDCl3  
NS 16  
DS 2  
SWH 2796.421 Hz  
FIDRES 0.682720 Hz  
AQ 0.7324148 sec  
RG 362  
DW 178.800 usec  
DE 6.00 usec  
TE 300.0 K  
D1 1.00000000 sec

===== CHANNEL f1 =====  
NUC1 1H  
P1 10.00 usec  
PL1 -3.00 dB  
SFO1 200.1313509 MHz  
F2 - Processing parameters  
SI 32768  
SF 200.1300241 MHz  
WDW EM  
SSB 0  
LB 0.03 Hz  
GB 0  
PC 1.00



nk1-41-1 carbon

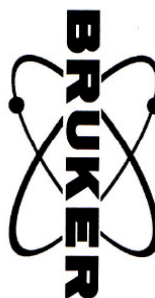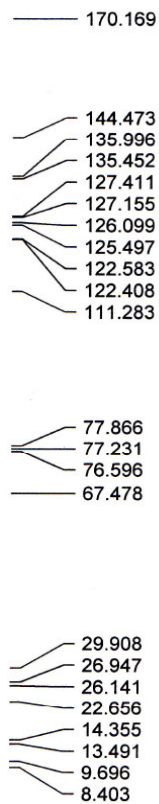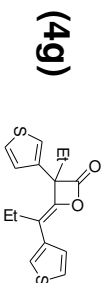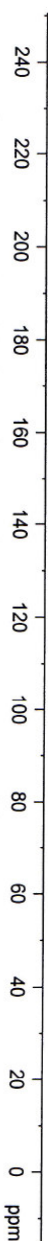

Current Data Parameters  
NAME N\_Kerrigan  
EXPNO 54  
PROCNO 1

F2 - Acquisition Parameters  
Date\_ 20080910  
Time 9.30

INSTRUM spect  
PROBHD 5 mm Multinu  
PULPROG zgdc  
TD 37686  
SOLVENT CDCl3  
NS 9500  
DS 4

SWH 12562.814 Hz  
FIDRES 0.33335 Hz  
AQ 1.4999528 sec  
RG 57  
DM 39.800 usec  
DE 6.00 usec  
TE 300.0 K  
D1 4.00000000 sec  
d11 0.03000000 sec

===== CHANNEL f1 =====  
NUC1 13C  
P1 6.00 usec  
PL1 1.00 dB  
SFO1 50.3285046 MHz

===== CHANNEL f2 =====  
CPDPRG2 waltz16  
NUC2 1H  
PCPD2 100.00 usec  
PL2 -4.00 dB  
PL12 16.72 dB  
SFO2 200.1300000 MHz

F2 - Processing parameters  
SI 32768  
SF 50.3227208 MHz  
WDW EM  
SSB 0  
LB 3.00 Hz  
GB 0  
PC 1.40

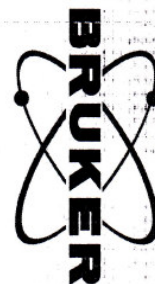

7.471  
7.438  
7.432  
7.351  
7.312  
7.296  
7.284  
7.274  
7.247  
7.220  
7.187  
7.114  
7.103  
7.075  
7.067

1.684  
1.659  
1.633  
1.600  
1.577  
1.533  
1.402  
1.273  
1.255  
1.185  
0.809  
0.780  
0.000

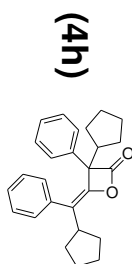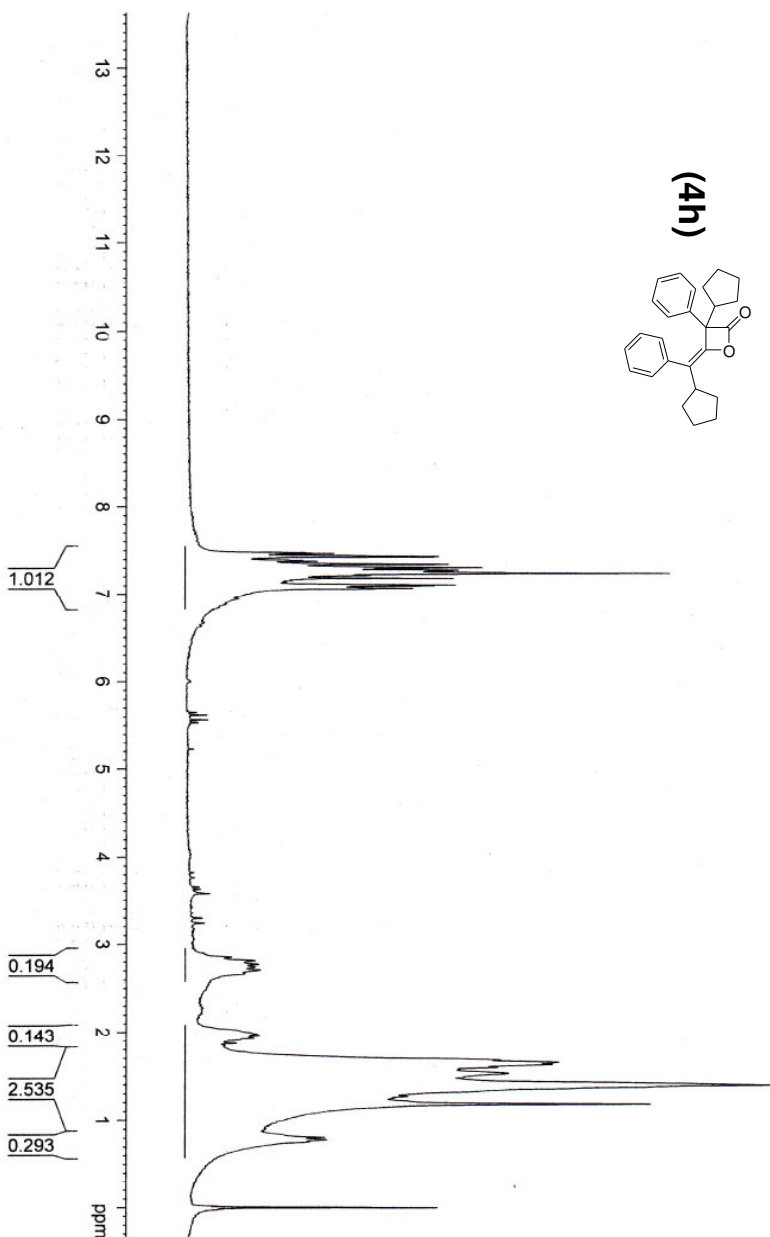

Current Data Parameters  
NAME G Harzmann  
EXNO 144  
PROCNO 1

F2 - Acquisition Parameters

Date\_ 20080630  
Time 9.47  
INSTRUM spect  
PROBHD 5 mm Multinu  
PULPROG zg  
TD 4096  
SOLVENT CDCl3  
NS 16  
DS 2  
SWH 2796.421 Hz  
FIDRES 0.682720 Hz  
AQ 0.7324148 sec  
RG 101.6  
DW 178.800 usec  
DE 6.00 usec  
TE 300.0 K  
D1 3.00000000 sec

===== CHANNEL F1 =====

NUC1 1H  
P1 10.00 usec  
PL1 -3.00 dB  
SFO1 200.1313509 MHz

F2 - Processing parameters

SI 32768  
SF 200.1300230 MHz  
WDW EM  
SSB 0  
LB 0.03 Hz  
GB 0  
PC 1.00

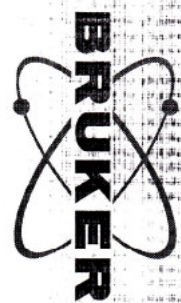

Current Data Parameters  
 NAME G Harzmann  
 EXPNO 153  
 PROCNO 1

F2 - Acquisition Parameters  
 Date\_ 20080719  
 Time\_ 18.26  
 INSTRUM spect  
 PROBHD 5 mm Multinu  
 PULPROG zgdc  
 TD 37686  
 SOLVENT CDCl3  
 NS 15042  
 DS 4  
 SWH 12562.814 Hz  
 FIDRES 0.333355 Hz  
 AQ 1.4999528 sec  
 RG 80.6  
 DW 39.800 usec  
 DE 6.00 usec  
 TE 300.0 K  
 D1 4.00000000 sec  
 d11 0.03000000 sec

===== CHANNEL f1 =====  
 NUC1 13C  
 P1 6.00 usec  
 PL1 1.00 dB  
 SFO1 50.3285046 MHz

===== CHANNEL f2 =====  
 CPDPRG2 waltz16  
 NUC2 1H  
 PCPD2 100.00 usec  
 PL2 -4.00 dB  
 PL12 16.72 dB  
 SFO2 200.1300000 MHz

F2 - Processing parameters  
 SI 32768  
 SF 50.3227193 MHz  
 WDW EM  
 SSB 0  
 LB 3.00 Hz  
 GB 0  
 PC 1.40

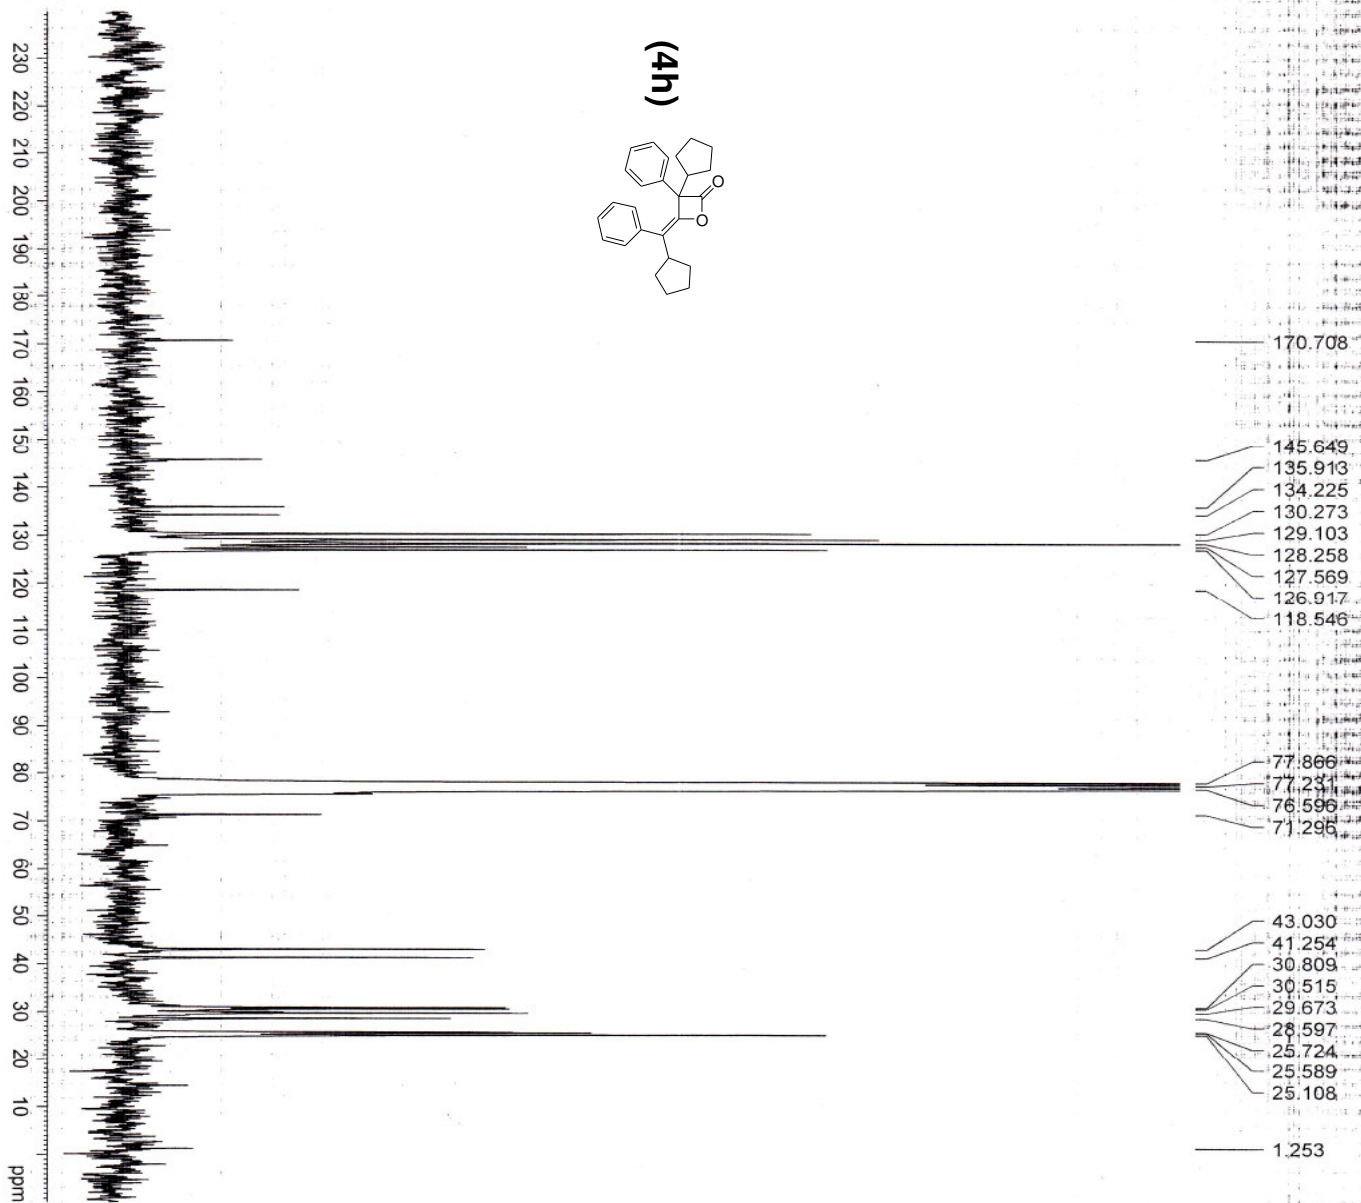

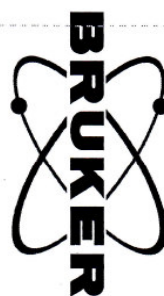

Current Data Parameters  
 NAME G Harzmann  
 EXNO 88  
 PROCNO 1

F2 - Acquisition Parameters  
 Date\_ 20080501  
 Time\_ 11.36

INSTRUM spect  
 PROBD 5 mm Multinu  
 PULPROG zg  
 TD 4096  
 SOLVENT CDCl3  
 NS 16  
 DS 2

SWH 2796.421 Hz  
 FIDRES 0.682720 Hz  
 AQ 0.7324148 sec  
 RG 90.5

DW 178.800 usec  
 DE 6.00 usec  
 TE 300.0 K  
 D1 1.00000000 sec

===== CHANNEL f1 =====  
 NUC1 1H  
 P1 10.00 usec  
 PL1 -3.00 dB  
 SFO1 200.1313509 MHz

F2 - Processing parameters  
 SI 32768  
 SF 200.1300093 MHz  
 WDW EM  
 SSB 0  
 LB 0.03 Hz  
 GB 0  
 PC 1.00

7.207  
 7.191  
 7.175  
 7.163  
 7.127  
 7.119  
 7.110  
 7.102  
 7.095  
 7.087  
 7.078  
 7.065  
 7.051  
 7.042  
 7.034  
 7.026  
 7.016  
 6.999  
 6.876  
 6.862  
 6.855  
 6.846  
 6.828  
 4.249  
 4.190  
 3.855  
 3.796  
 3.543  
 3.510  
 3.501  
 3.468  
 2.238  
 2.221  
 2.201  
 2.184  
 2.164  
 2.148  
 1.802  
 1.793  
 1.766  
 1.756  
 1.732  
 1.715  
 0.946  
 0.909

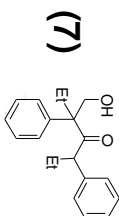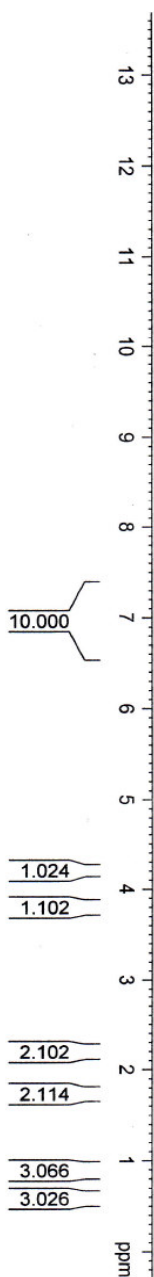



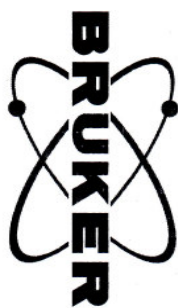

Current Data Parameters  
 NAME N\_Kerrigan  
 EXPNO 41  
 PROCNO 1

# F2 - Acquisition Parameters

Date\_ 20080406  
 Time\_ 11.58  
 INSTRUM spect  
 PROBD 5 mm Multinu  
 PULPROG zgdc  
 TD 37686  
 SOLVENT CDCl3  
 NS 9500  
 DS 4  
 SWH 12562.814 Hz  
 FIDRES 0.33335 Hz  
 AQ 1.4999528 sec  
 RG 90.5  
 DW 39.800 usec  
 DE 6.00 usec  
 TE 300.0 K  
 D1 4.00000000 sec  
 d11 0.03000000 sec

===== CHANNEL f1 =====  
 NUC1 13C  
 P1 6.00 usec  
 PL1 1.00 dB  
 SFO1 50.3285046 MHz

===== CHANNEL f2 =====  
 CPDPRG2 waltz16  
 NUC2 1H  
 PCPD2 100.00 usec  
 PL2 -4.00 dB  
 PL12 16.72 dB  
 SFO2 200.1300000 MHz

F2 - Processing parameters  
 SI 32768  
 SF 50.3227224 MHz  
 WDW EM  
 SSB 0  
 LB 3.00 Hz  
 GB 0  
 PC 1.40

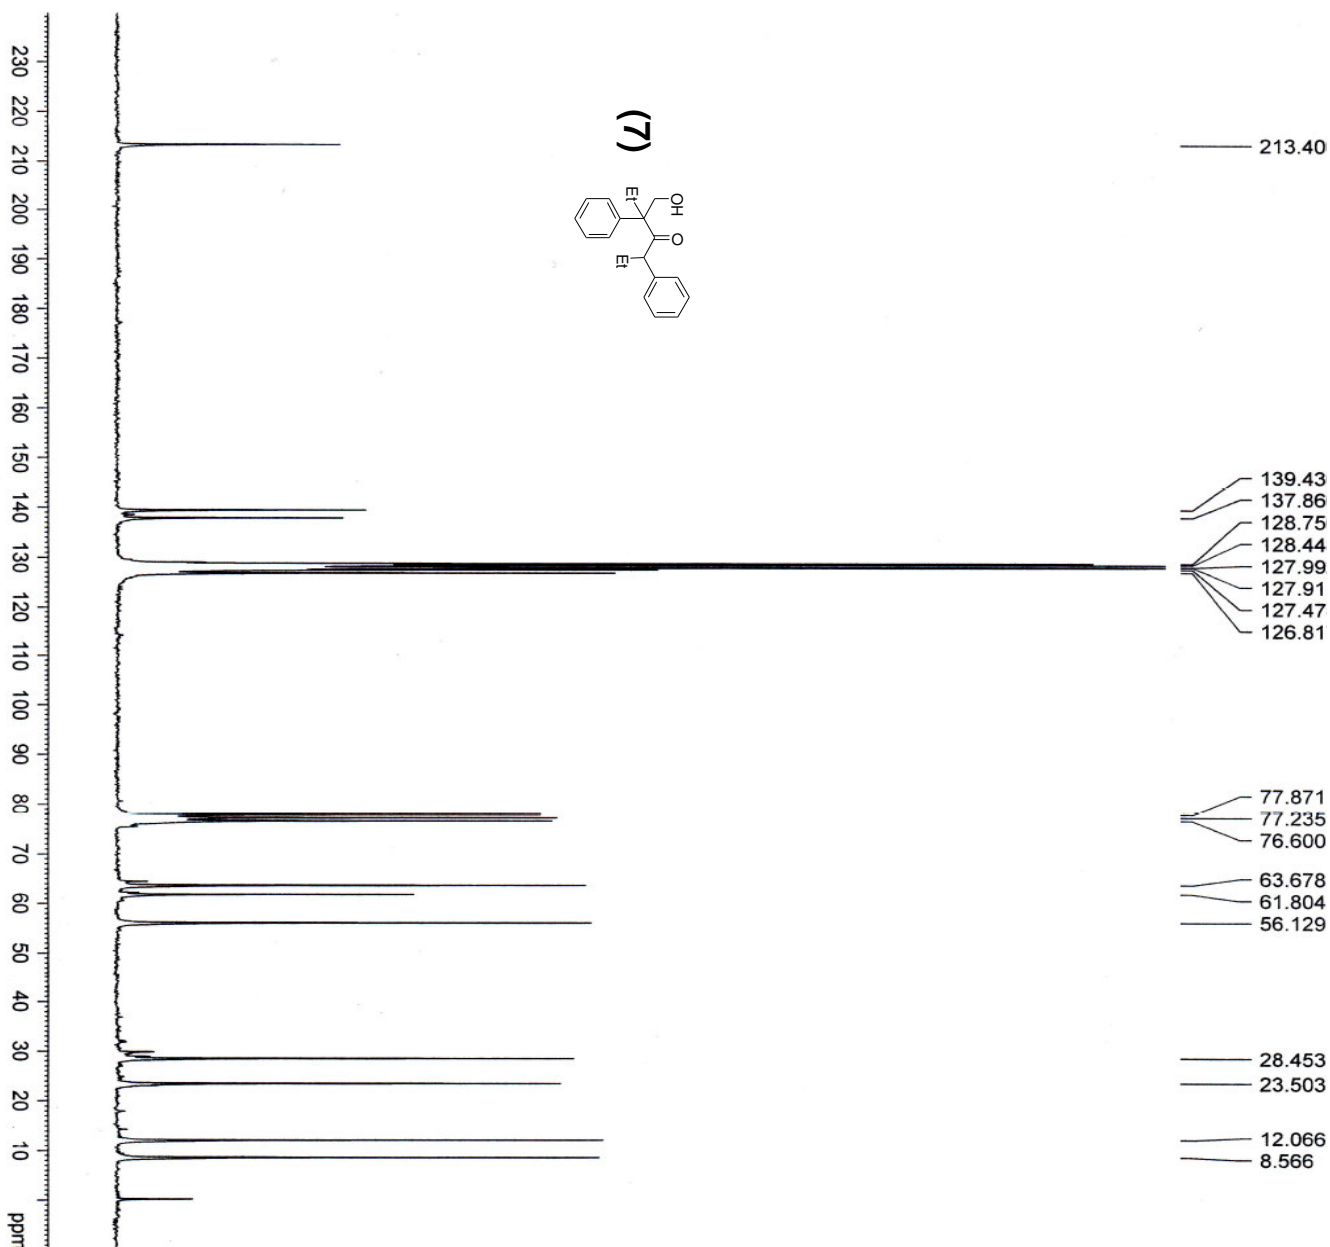

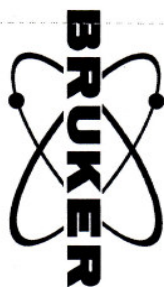

AI-2-50-1

(8)

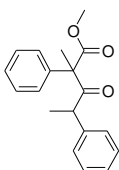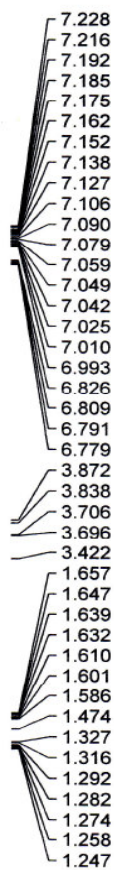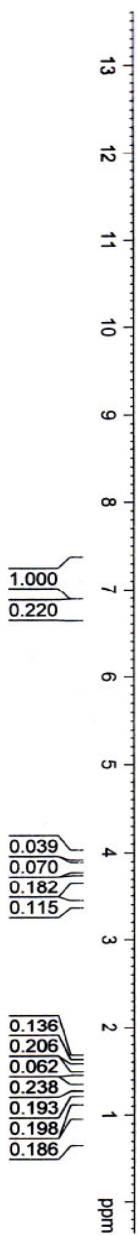

Current Data Parameters  
NAME Ahmad  
EXPNO 248  
PROCNO 1

F2 - Acquisition Parameters  
Date\_ 20080418  
Time 15.16  
INSTRUM spect  
PROBHD 5 mm Multinu  
PULPROG zg  
TD 4096  
SOLVENT CDCl3  
NS 16  
DS 2  
SWH 2796.421 Hz  
FIDRES 0.582720 Hz  
AQ 0.7324148 sec  
RG 574.7  
DW 178.800 usec  
DE 6.00 usec  
TE 300.0 K  
D1 3.00000000 sec

===== CHANNEL f1 =====  
NUC1 1H  
P1 10.00 usec  
PL1 -3.00 dB  
SFO1 200.1313509 MHz  
F2 - Processing parameters  
SI 32768  
SF 200.1300233 MHz  
WDW EM  
SSB 0  
LB 0.03 Hz  
GB 0  
PC 1.00

AI-2-50-1

208.220  
207.525

172.917  
172.254

141.349  
138.274  
137.528  
128.603  
128.477  
128.145  
127.957  
127.489  
127.031  
126.708

77.872  
77.237  
76.602  
65.495  
65.393  
52.727  
52.481  
49.696  
49.478

29.910  
22.351  
22.157  
21.912  
21.458

(8)

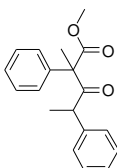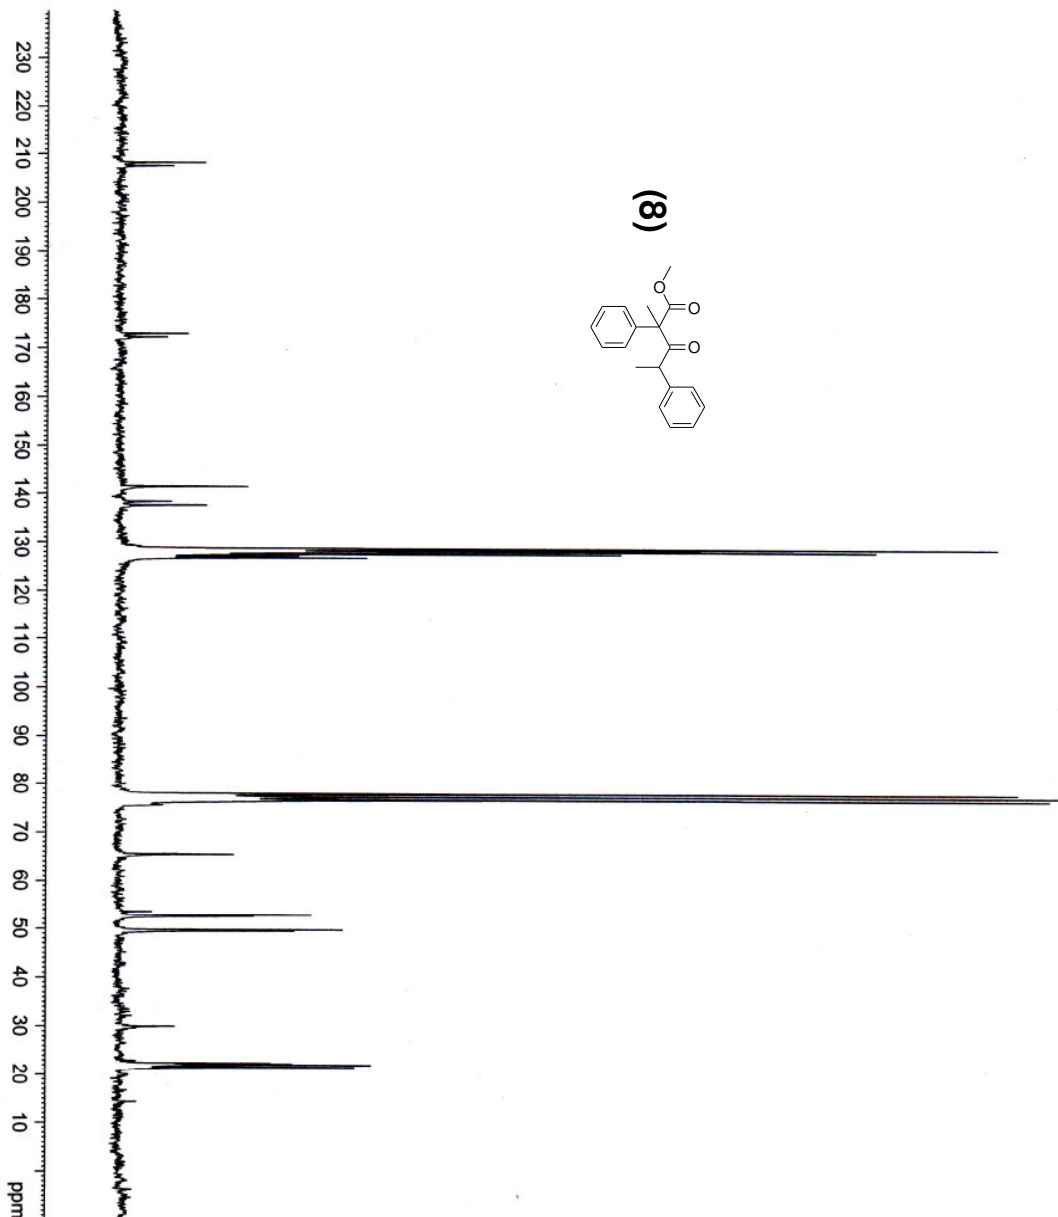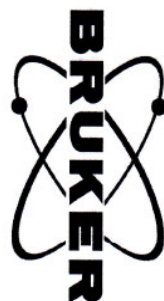

Current Data Parameters  
NAME Ahmad  
EXPNO 249  
PROCNO 1

F2 - Acquisition Parameters  
Date\_ 20080422  
Time\_ 10.38

INSTRUM spect  
PROBHD 5 mm Multinu  
PULPROG zgpg  
TD 37686  
SOLVENT DMSO  
NS 9500  
DS 4

SWH 12562.814 Hz  
FIDRES 0.33335 Hz  
AQ 1.4999528 sec  
RG 90.5

DW 39.800 usec  
DE 6.00 usec  
TE 300.0 K  
D1 4.00000000 sec  
d11 0.03000000 sec

===== CHANNEL f1 =====  
NUC1 13C  
P1 6.00 usec  
PL1 1.00 dB  
SFO1 50.3285046 MHz

===== CHANNEL f2 =====  
CPDPRG2 waltz16  
NUC2 1H  
PCPD2 100.00 usec  
PL2 -4.00 dB  
PL12 16.72 dB  
SFO2 200.1300000 MHz

F2 - Processing parameters  
SI 32768  
SF 50.3227193 MHz  
WDW EM  
SSB 0  
LB 3.00 Hz  
GB 0  
PC 1.40

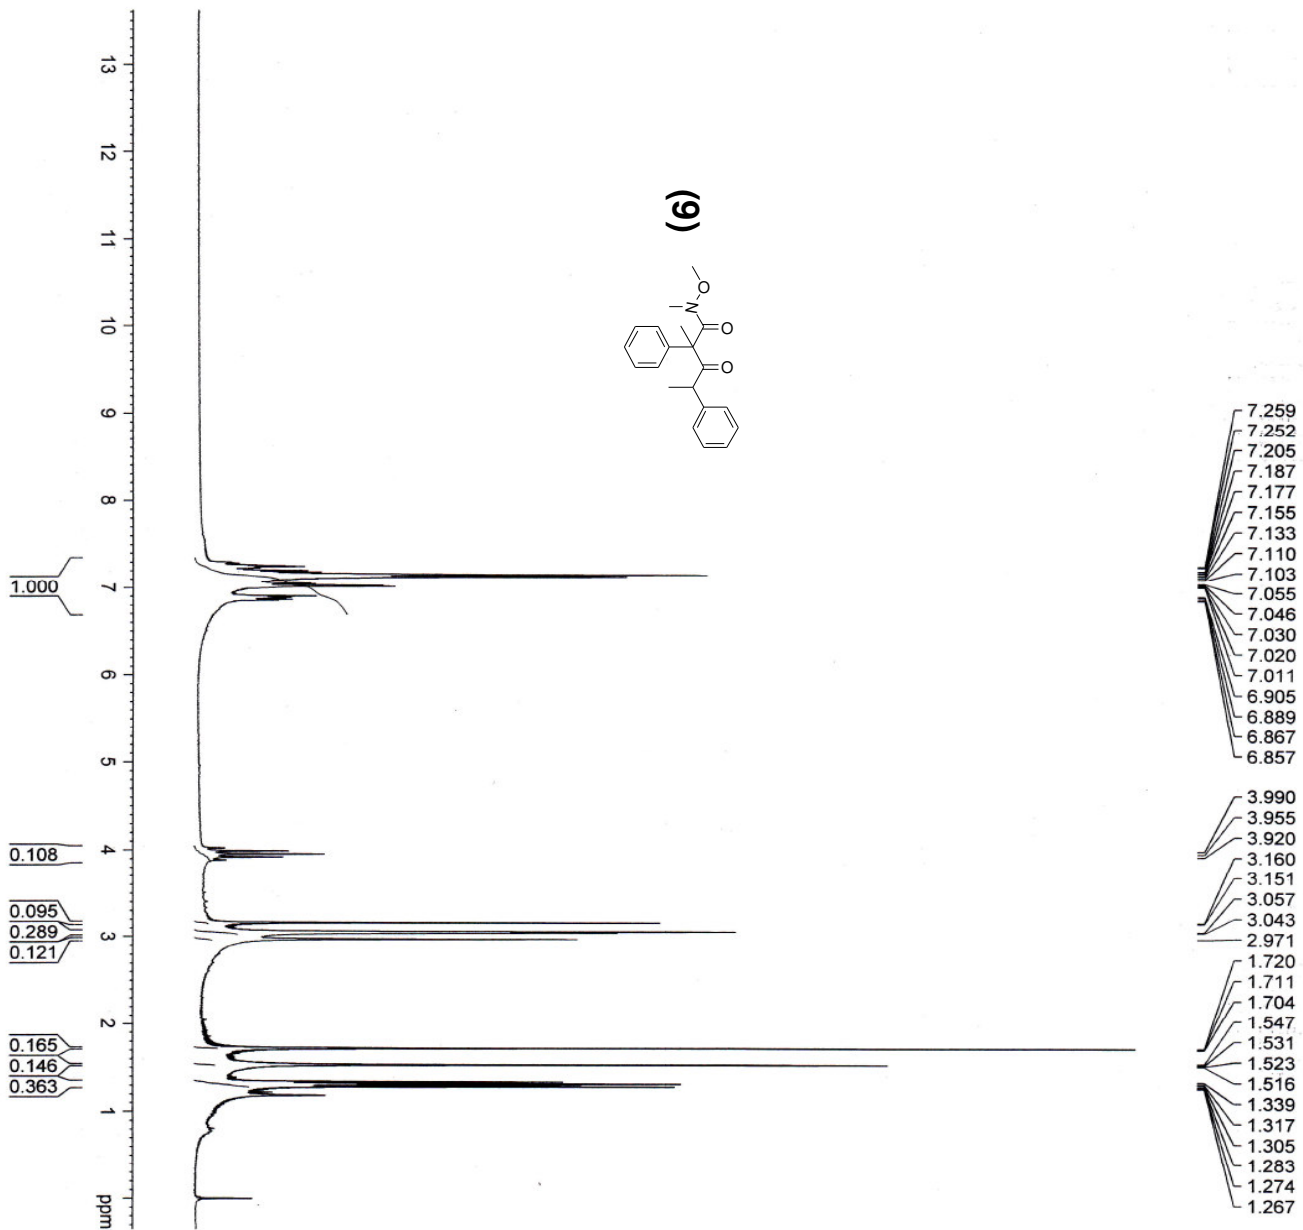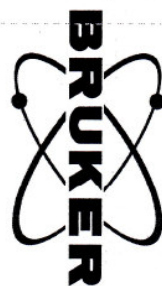

Current Data Parameters  
 NAME G Harzmann  
 EXPNO 92  
 PROCNO 1

F2 - Acquisition Parameters  
 Date\_ 20080506  
 Time\_ 17.06  
 INSTRUM spect  
 PROBHD 5 mm Multinu  
 PULPROG zg  
 TD 4096  
 SOLVENT CDCl3  
 NS 16  
 DS 2  
 SWH 2796.421 Hz  
 FIDRES 0.682720 Hz  
 AQ 0.7324148 sec  
 RG 90.5  
 DW 178.800 usec  
 DE 6.00 usec  
 TE 300.0 K  
 D1 1.0000000 sec

==== CHANNEL f1 =====  
 NUC1 1H  
 P1 10.00 usec  
 PL1 -3.00 dB  
 SFO1 200.1313509 MHz  
 F2 - Processing Parameters  
 SI 32768  
 SF 200.1300232 MHz  
 WDW EM  
 SSB 0  
 LB 0.03 Hz  
 GB 0  
 PC 1.00



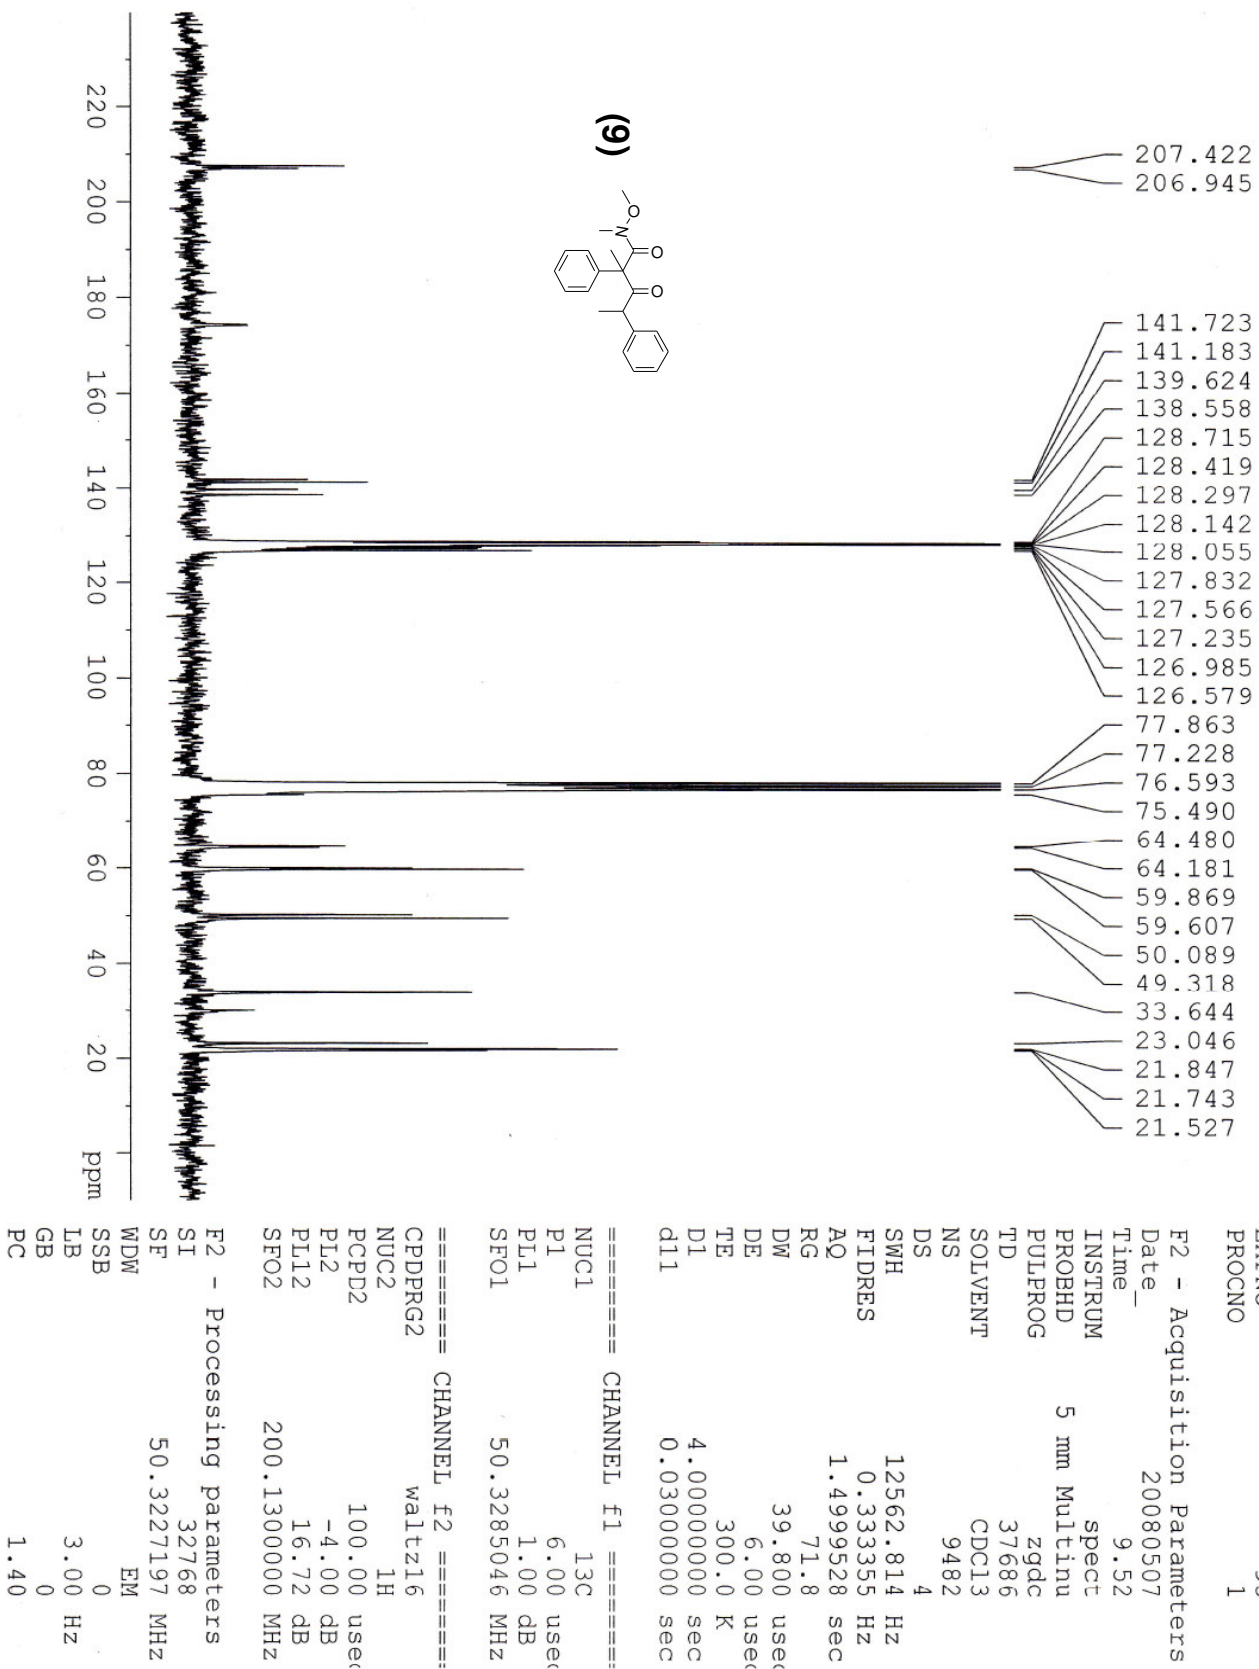

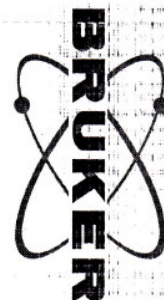

7.271  
7.222  
7.211  
7.194  
7.178  
7.158  
7.149  
7.132  
7.115  
7.098  
7.087  
7.072  
7.058  
7.041  
7.022  
7.009  
6.992  
6.974  
6.950  
6.936  
6.927  
6.900  
6.887  
6.872  
6.858  
6.851  
6.843  
6.820  
6.802  
6.783  
6.772  
3.937  
3.902  
3.868  
3.834  
2.436  
2.397  
2.387  
2.349  
2.327  
2.309  
2.271  
2.262  
2.250  
2.219  
2.207  
2.184  
1.832  
1.712  
1.681  
1.672  
1.664  
1.657  
1.650

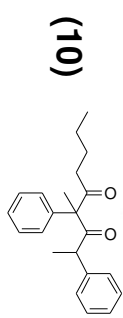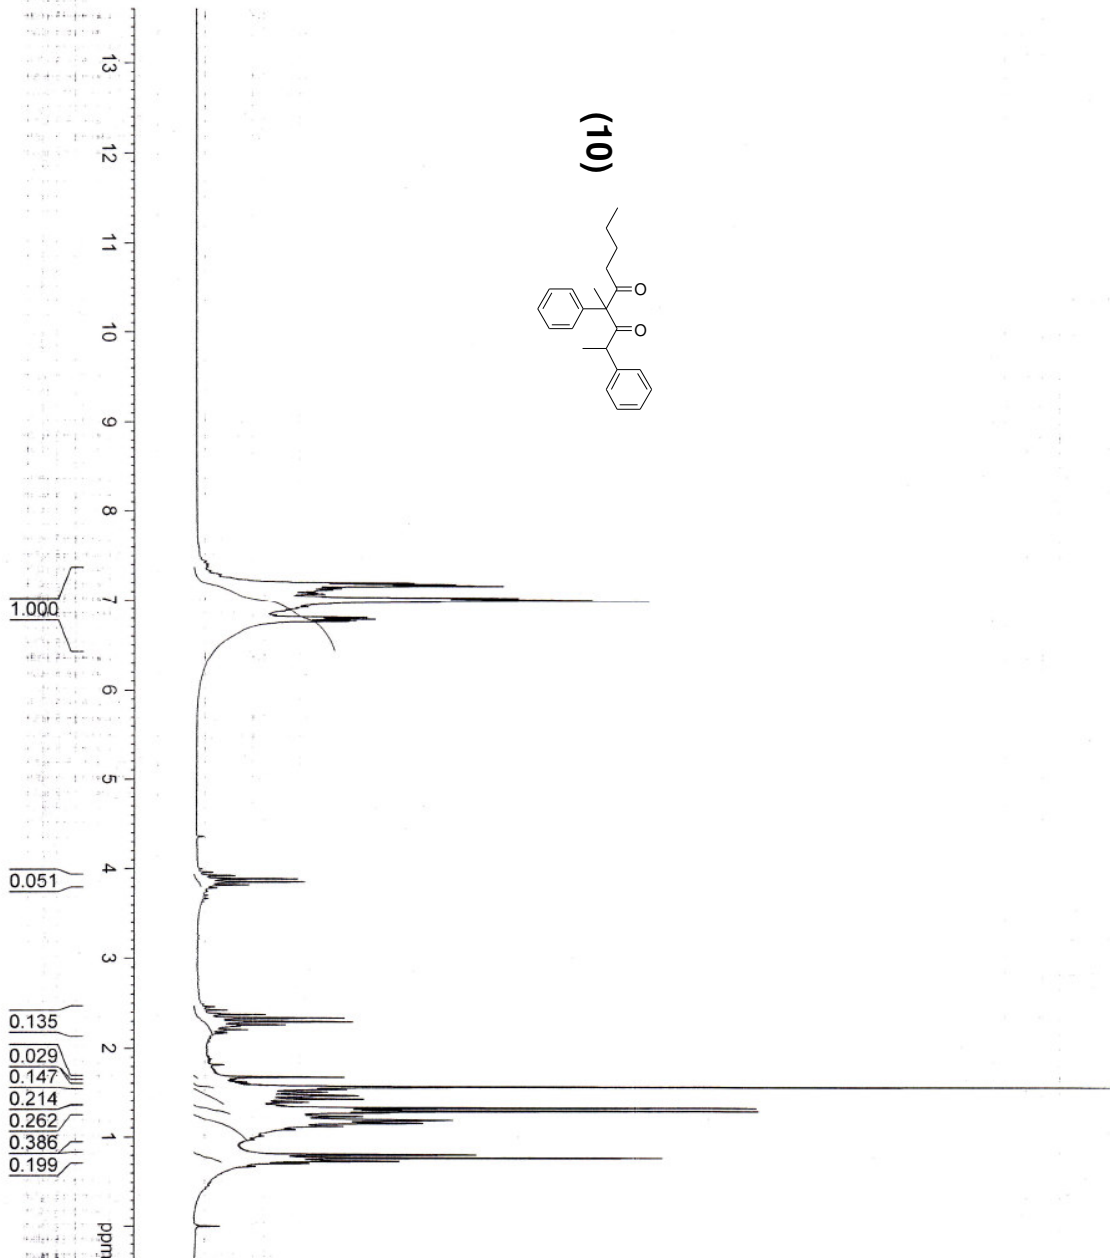

Current Data Parameters  
NAME Ahmad  
EXPNO 272  
PROCNO 1

F2 - Acquisition Parameters  
Date\_ 20080620  
Time 15.19  
INSTRUM spect  
PROBHD 5 mm Multinu  
PULPROG zg  
TD 4096  
SOLVENT CDCl3  
NS 16  
DS 2  
SWH 2796.421 Hz  
FIDRES 0.682720 Hz  
AQ 0.7324148 sec  
RG 90.5  
DW 178.800 usec  
DE 6.00 usec  
TE 300.0 K  
D1 3.00000000 sec

===== CHANNEL f1 =====  
NUC1 1H  
P1 10.00 usec  
PL1 -3.00 dB  
SFO1 200.1313509 MHz

F2 - Processing parameters  
SI 32768  
SF 200.1300260 MHz  
WDW EM  
SSB 0  
LB 0.03 Hz  
GB 0  
PC 1.00

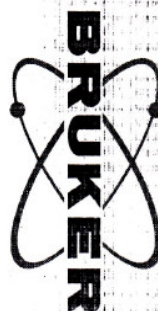

Current Data Parameters  
NAME Ahmad  
EXPNO 280  
PROCNO 1

F2 - Acquisition Parameters

Date\_ 20080716  
Time 9.51  
INSTRUM spect  
PROBHD 5 mm Multinu  
PULPROG zgpg  
TD 32768  
SOLVENT CDCl3  
NS 9500  
DS 4  
SWH 12562.814 Hz  
FIDRES 0.333355 Hz  
AQ 1.4999528 sec  
RG 64  
DW 39.800 usec  
DE 6.00 usec  
TE 300.0 K  
D1 4.00000000 sec  
d11 0.03000000 sec

===== CHANNEL f1 =====

NUC1 13C  
P1 6.00 usec  
PL1 1.00 dB  
SFO1 50.3285046 MHz

===== CHANNEL f2 =====

CPDPRG2 waltz16  
NUC2 1H  
PCPD2 100.00 usec  
PL2 -4.00 dB  
PL12 16.72 dB  
SFO2 200.1300000 MHz

F2 - Processing parameters

SI 32768  
SF 50.3227239 MHz  
WDW EM  
SSB 0  
LB 3.00 Hz  
GB 0  
PC 1.40

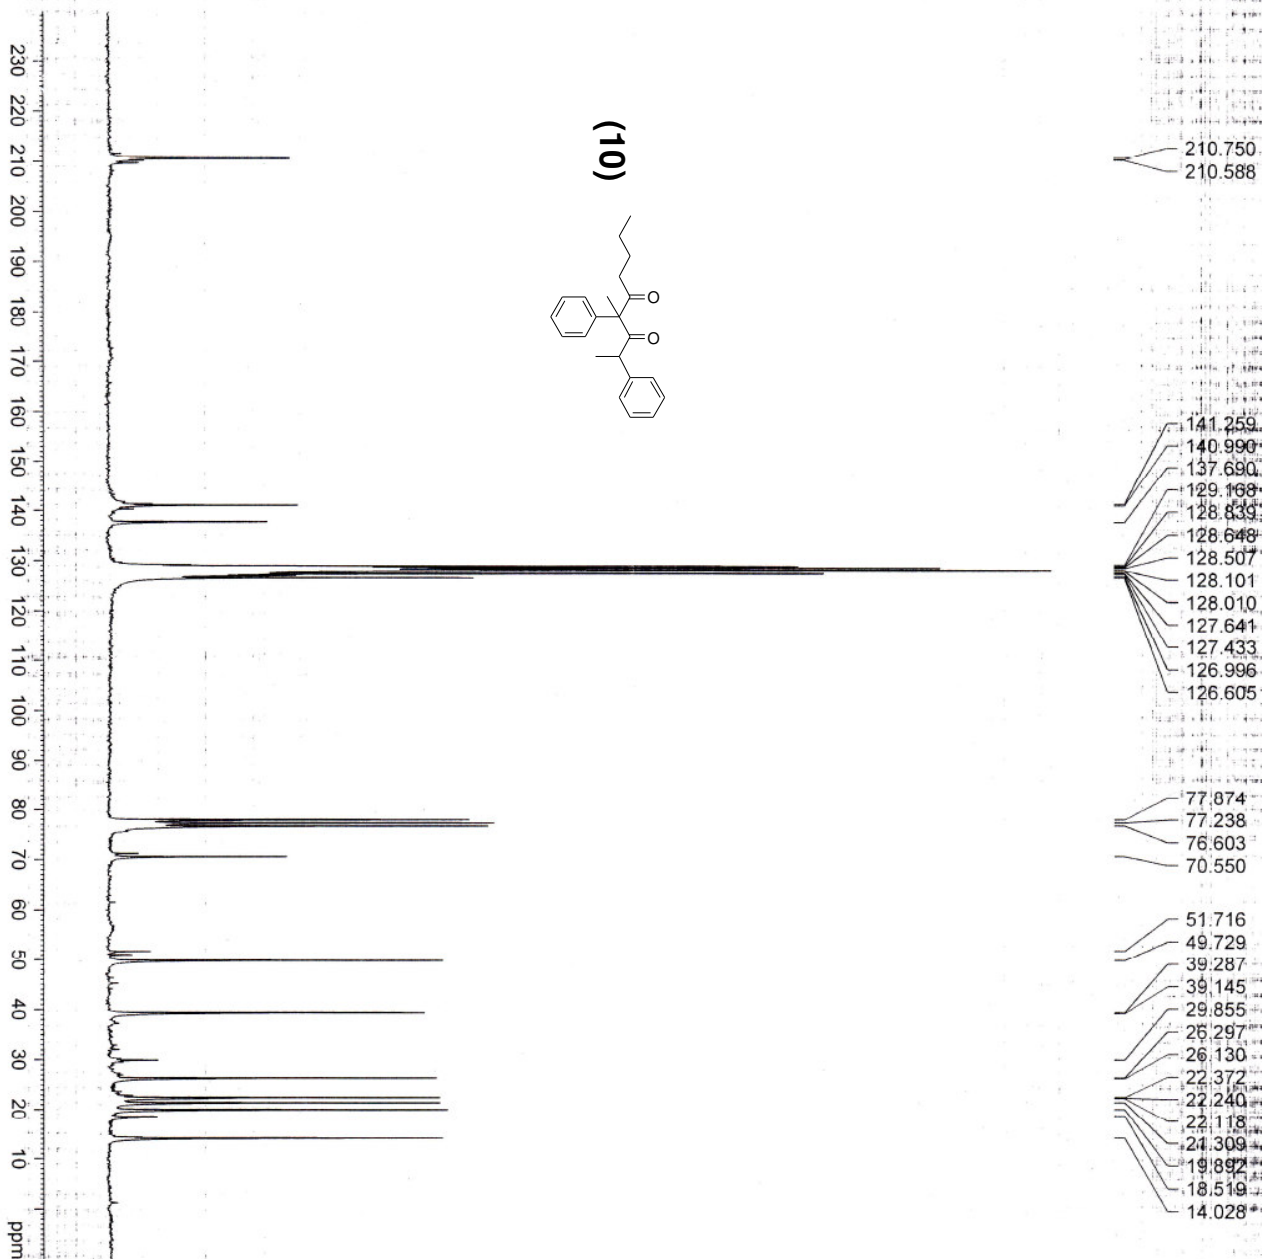

Supplement: Supplementary file 1 [file 4574884]
